# Supplementary material for: Synthesis and Validation of TRIFAPYs as a Family of Transfection Agents for Therapeutic Oligonucleotides
Source: MDPI journal article supplement (doi:10.3390/biom14040390), 2024-03-25
Supplement: s1 [file s1]

## Supplementary data

### Supporting Information Available

- Spectroscopic data for alkoxyppyridines **1a-1i**
- <sup>1</sup>H and <sup>13</sup>C NMR spectra of compounds **1a-1i**, **2a-2i** and **3**.

**4-Butoxypyridine (1a):** <sup>1</sup>H NMR (400 MHz, CDCl<sub>3</sub>) δ 8.40 (d, *J* = 5.0 Hz, 2H), 6.79 (d, *J* = 5.0 Hz, 2H), 4.01 (t, *J* = 6.5 Hz, 2H), 1.82-1.75 (m, 2H), 1.49 (sex, *J* = 7.4 Hz, 2H), 0.98 (t, *J* = 7.4 Hz, 3H). <sup>13</sup>C NMR (100.6 MHz, CDCl<sub>3</sub>) δ 165.2 (C), 151.1 (CH), 110.4 (CH), 67.7 (CH<sub>2</sub>), 31.0 (CH<sub>2</sub>), 19.2 (CH<sub>2</sub>), 13.9 (CH<sub>3</sub>).

**4-Hexyloxypyridine (1b):** <sup>1</sup>H NMR (400 MHz, CDCl<sub>3</sub>) δ 8.41 (d, *J* = 5.2 Hz, 2H), 6.79 (d, *J* = 5.2 Hz, 2H), 4.00 (t, *J* = 6.5 Hz, 2H), 1.83-1.76 (m, 2H), 1.49-1.42 (m, 2H), 1.36-1.32 (m, 4H), 0.91 (t, *J* = 7.0 Hz, 3H). <sup>13</sup>C NMR (100.6 MHz, CDCl<sub>3</sub>) δ 165.1 (C), 150.9 (CH), 110.3 (CH), 67.9 (CH<sub>2</sub>), 31.5 (CH<sub>2</sub>), 28.8 (CH<sub>2</sub>), 25.6 (CH<sub>2</sub>), 22.5 (CH<sub>2</sub>), 14.0 (CH<sub>3</sub>).

**4-Dodecyloxypyridine (1e):** <sup>1</sup>H NMR (400 MHz, CDCl<sub>3</sub>) δ 8.41 (d, *J* = 5.0 Hz, 2H), 6.80 (d, *J* = 5.0 Hz, 2H), 4.00 (t, *J* = 6.6 Hz, 2H), 1.83-1.76 (m, 2H), 1.49-1.41 (m, 2H), 1.37-1.24 (m, 16H), 0.88 (t, *J* = 6.7 Hz, 3H). <sup>13</sup>C NMR (100.6 MHz, CDCl<sub>3</sub>) δ 164.9 (C), 158.8 (CH), 110.0 (CH), 67.6 (CH<sub>2</sub>), 31.8 (CH<sub>2</sub>), 29.6 (CH<sub>2</sub>), 29.5 (CH<sub>2</sub>), 29.5 (CH<sub>2</sub>), 29.4 (CH<sub>2</sub>), 29.2 (CH<sub>2</sub>), 29.1 (CH<sub>2</sub>), 28.7 (CH<sub>2</sub>), 25.8 (CH<sub>2</sub>), 22.5 (CH<sub>2</sub>), 14.0 (CH<sub>3</sub>).

**4-Tetradecyloxypyridine (1f):** <sup>1</sup>H NMR (400 MHz, CDCl<sub>3</sub>) δ 8.41 (d, *J* = 5.2 Hz, 2H), 6.79 (d, *J* = 5.2 Hz, 2H), 3.99 (t, *J* = 6.6 Hz, 2H), 1.83-1.76 (m, 2H), 1.48-1.41 (m, 2H), 1.36-1.24 (m, 20H), 0.87 (t, *J* = 7 Hz, 3H). <sup>13</sup>C NMR (100.6 MHz, CDCl<sub>3</sub>) δ 165.1 (C), 151.0 (CH), 110.3 (CH), 67.9 (CH<sub>2</sub>), 31.9 (CH<sub>2</sub>), 29.7 (CH<sub>2</sub>), 29.6 (CH<sub>2</sub>), 29.6 (CH<sub>2</sub>), 29.5 (CH<sub>2</sub>), 29.5 (CH<sub>2</sub>), 29.3 (CH<sub>2</sub>), 29.3 (CH<sub>2</sub>), 28.9 (CH<sub>2</sub>), 25.9 (CH<sub>2</sub>), 22.7 (CH<sub>2</sub>), 14.1 (CH<sub>3</sub>).

**4-Octyloxypyridine (1c):** <sup>1</sup>H NMR (400 MHz, CDCl<sub>3</sub>) δ 8.41 (d, *J* = 6.4 Hz, 2H), 6.78 (d, *J* = 6.4 Hz, 2H), 4.00 (t, *J* = 6.5 Hz, 2H), 1.83-1.76 (m, 2H), 1.49-1.41 (m, 2H), 1.34-1.29 (m, 8H), 0.90-0.87 (m, 3H). <sup>13</sup>C NMR (100.6 MHz, CDCl<sub>3</sub>) δ 164.9 (C), 150.8 (CH), 110.1 (CH), 67.7 (CH<sub>2</sub>), 31.6 (CH<sub>2</sub>), 29.1 (CH<sub>2</sub>), 29.0 (CH<sub>2</sub>), 28.7 (CH<sub>2</sub>), 25.8 (CH<sub>2</sub>), 22.5 (CH<sub>2</sub>), 13.9 (CH<sub>3</sub>).

**4-Decyloxypyridine (1d):** <sup>1</sup>H NMR (400 MHz, CDCl<sub>3</sub>) δ 8.39 (d, *J* = 4.9 Hz, 2H), 6.76 (d, *J* = 4.9 Hz, 2H), 3.96 (t, *J* = 6.6 Hz, 2H), 1.81-1.74 (m, 2H), 1.47-1.41 (m, 2H), 1.36-1.25 (m, 12H), 0.90-0.86 (m, 3H). <sup>13</sup>C NMR (100.6 MHz, CDCl<sub>3</sub>) δ 165.0 (C), 151.0 (CH), 110.2 (CH), 67.8 (CH<sub>2</sub>), 31.8 (CH<sub>2</sub>), 29.5 (CH<sub>2</sub>), 29.3 (CH<sub>2</sub>), 29.2 (CH<sub>2</sub>), 28.8 (CH<sub>2</sub>), 25.9 (CH<sub>2</sub>), 22.6 (CH<sub>2</sub>), 14.0 (CH<sub>3</sub>).

**4-Hexadecyloxypyridine (1g):** <sup>1</sup>H NMR (400 MHz, CDCl<sub>3</sub>) δ 8.41 (d, *J* = 5.0 Hz, 2H), 6.78 (d, *J* = 5.0 Hz, 2H), 3.98 (t, *J* = 6.5 Hz, 2H), 1.85-1.73 (m, 2H), 1.50-1.33 (m, 2H), 1.36-1.24 (m, 24H), 0.88 (t, *J* = 6.6 Hz, 3H). <sup>13</sup>C NMR (100.6 MHz, CDCl<sub>3</sub>) δ 165.1 (C), 150.9 (CH), 110.3 (CH), 67.9 (CH<sub>2</sub>), 31.9 (CH<sub>2</sub>), 29.7 (CH<sub>2</sub>), 29.7 (CH<sub>2</sub>), 29.7 (CH<sub>2</sub>), 29.6 (CH<sub>2</sub>), 29.5 (CH<sub>2</sub>), 29.4 (CH<sub>2</sub>), 29.3 (CH<sub>2</sub>), 28.9 (CH<sub>2</sub>), 25.9 (CH<sub>2</sub>), 22.7 (CH<sub>2</sub>), 14.1 (CH<sub>3</sub>).

**4-Octadecyloxypyridine (1h):** <sup>1</sup>H NMR (400 MHz, CDCl<sub>3</sub>) δ 8.40 (d, *J* = 6.5 Hz, 2H), 6.77 (d, *J* = 6.5 Hz, 2H), 3.98 (t, *J* = 6.5 Hz, 2H), 1.82-1.75 (m, 2H), 1.48-1.41 (m, 2H), 1.34-1.23 (m, 28H), 0.88 (t, *J* = 6.8 Hz, 3H).

**4-Eicosanoyloxypyridine (1i):** <sup>1</sup>H NMR (400 MHz, CDCl<sub>3</sub>) δ 8.34 (d, *J* = 6.0 Hz, 2H), 6.73 (d, *J* = 6.0 Hz, 2H), 3.96 (t, *J* = 6.6 Hz, 2H), 1.76-1.69 (m, 2H), 1.41-1.34 (m, 2H), 1.29-1.15 (m, 32H), 0.80 (t, *J* = 7 Hz, 3H). <sup>13</sup>C NMR (100.6 MHz, CDCl<sub>3</sub>) δ 165.3 (C), 150.7 (CH), 110.3 (CH), 68.0 (CH<sub>2</sub>), 31.9 (CH<sub>2</sub>), 29.7 (CH<sub>2</sub>), 29.6 (CH<sub>2</sub>), 29.6 (CH<sub>2</sub>), 29.5 (CH<sub>2</sub>), 29.5 (CH<sub>2</sub>), 29.3 (CH<sub>2</sub>), 29.3 (CH<sub>2</sub>), 28.8 (CH<sub>2</sub>), 25.9 (CH<sub>2</sub>), 22.7 (CH<sub>2</sub>), 14.1 (CH<sub>3</sub>).

**A.**

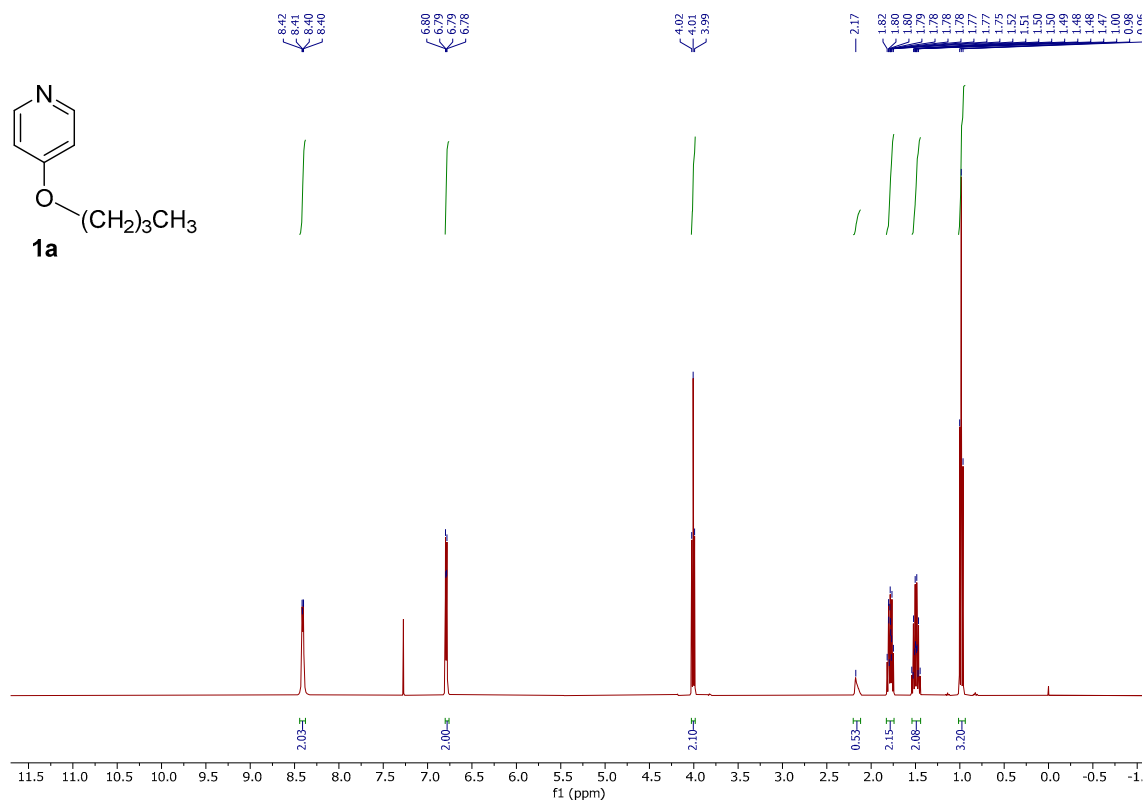

**B.**

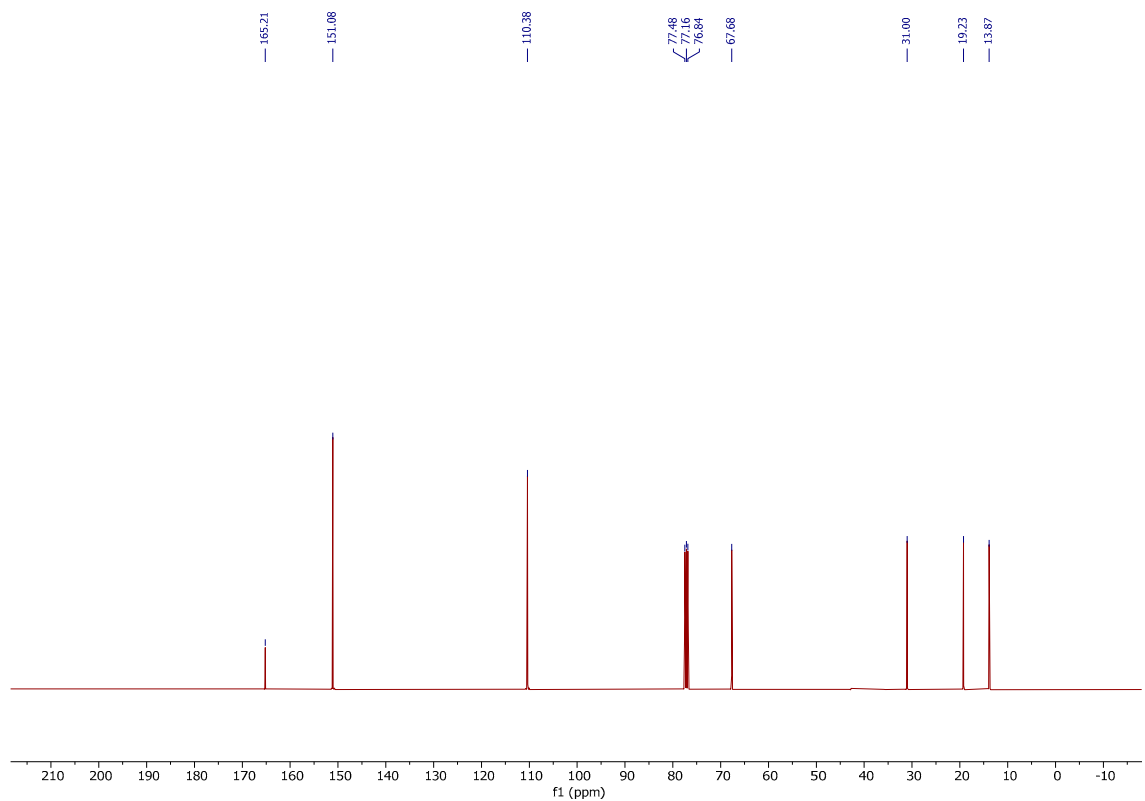

**Figure S1. (A) <sup>1</sup>H-NMR (400 MHz, CDCl<sub>3</sub>) and (B) <sup>13</sup>C NMR (100.6 MHz, CDCl<sub>3</sub>) spectra of 4-butoxypyridine.**

**A.**

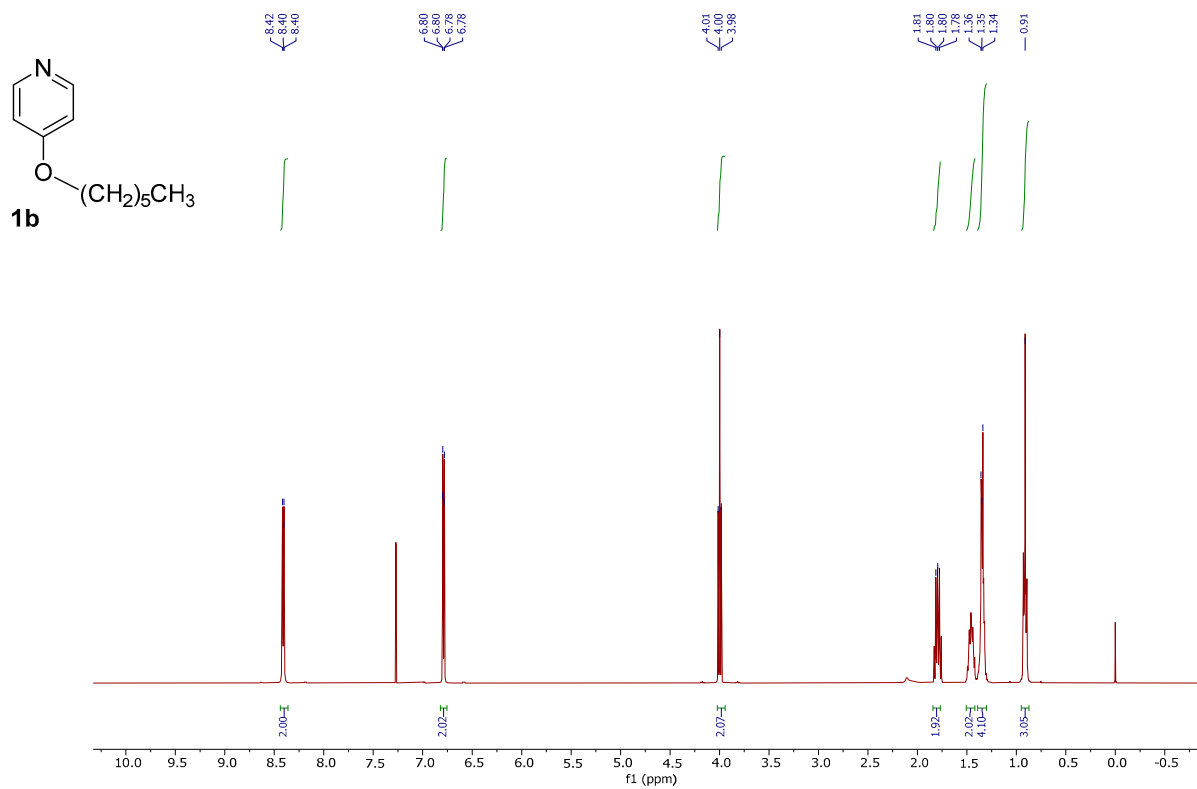

**B.**

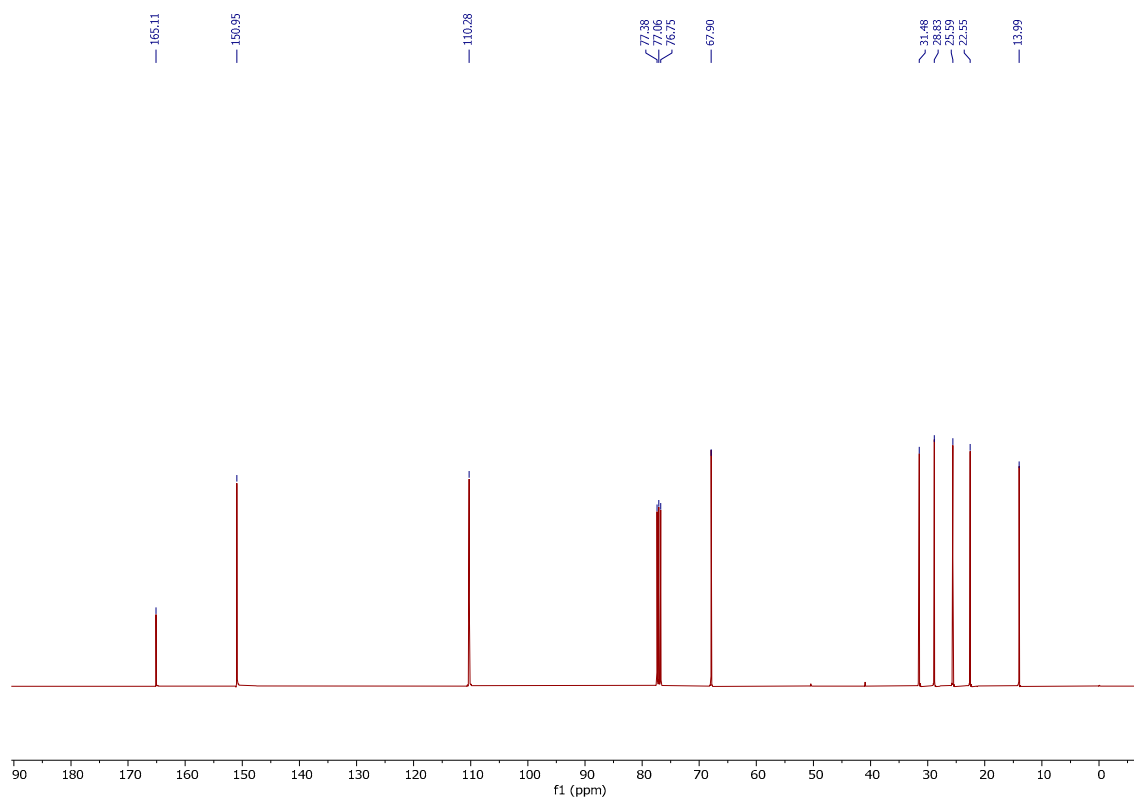

**Figure S2. (A) <sup>1</sup>H-NMR (400 MHz, CDCl<sub>3</sub>) and (B) <sup>13</sup>C NMR (100.6 MHz, CDCl<sub>3</sub>) spectra of 4-Hexyloxy pyridine.**

**A.**

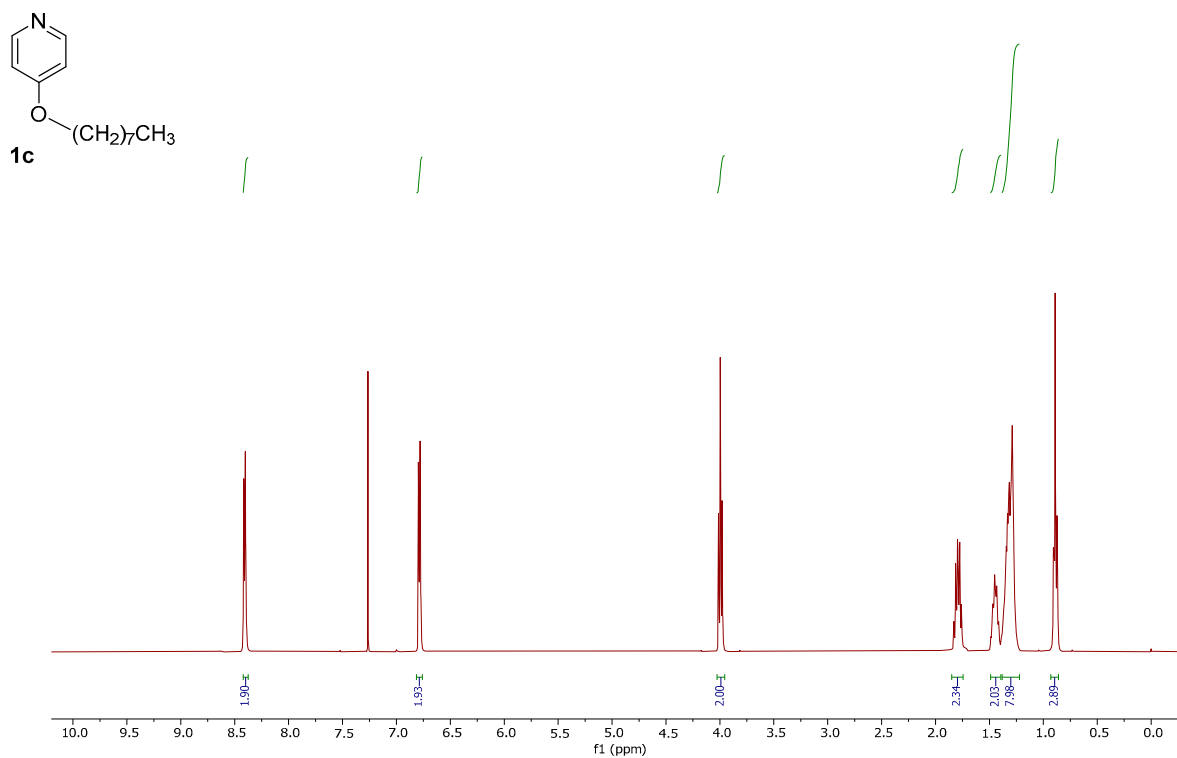

**B.**

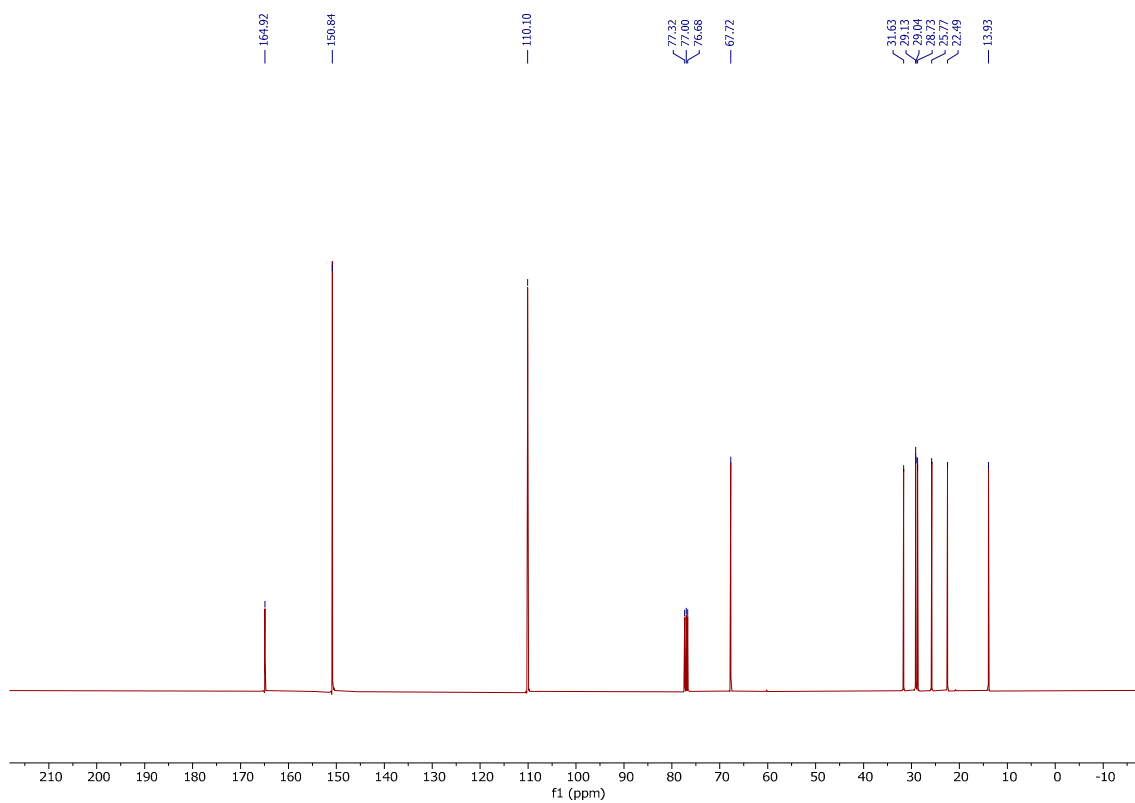

**Figure S3. (A)  $^1\text{H}$ -NMR (400 MHz,  $\text{CDCl}_3$ ) and (B)  $^{13}\text{C}$  NMR (100.6 MHz,  $\text{CDCl}_3$ ) spectra of 4-Octyloxy pyridine.**

**A.**

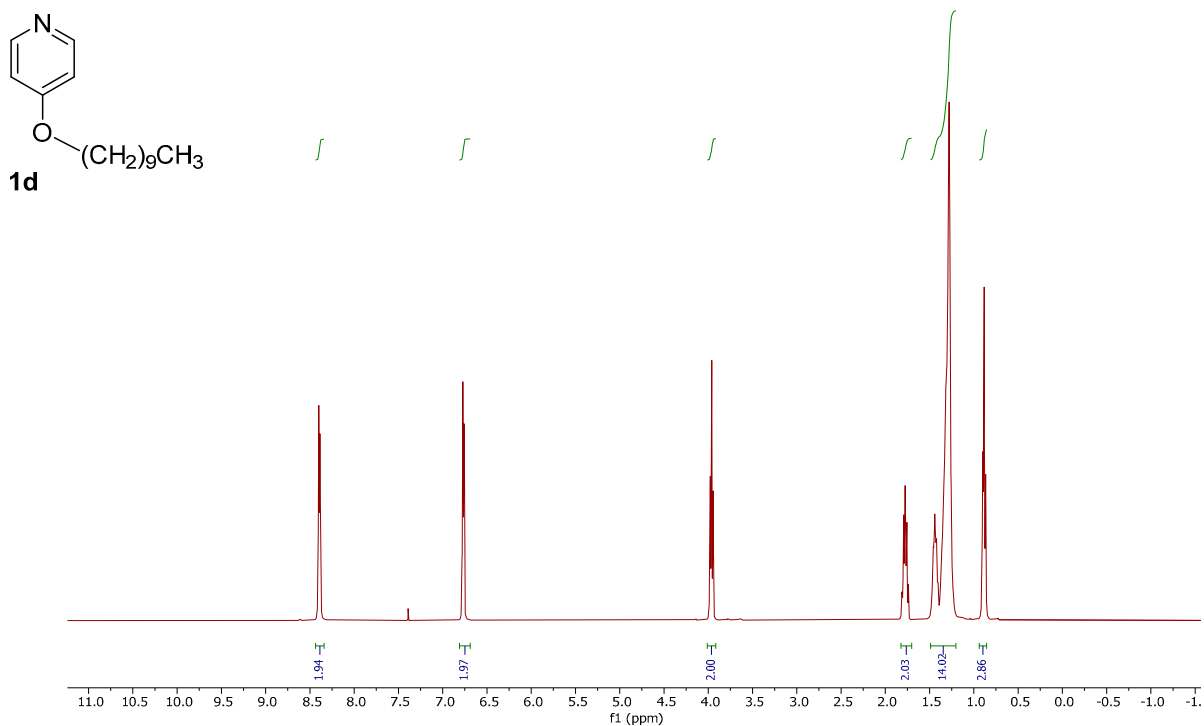

**B.**

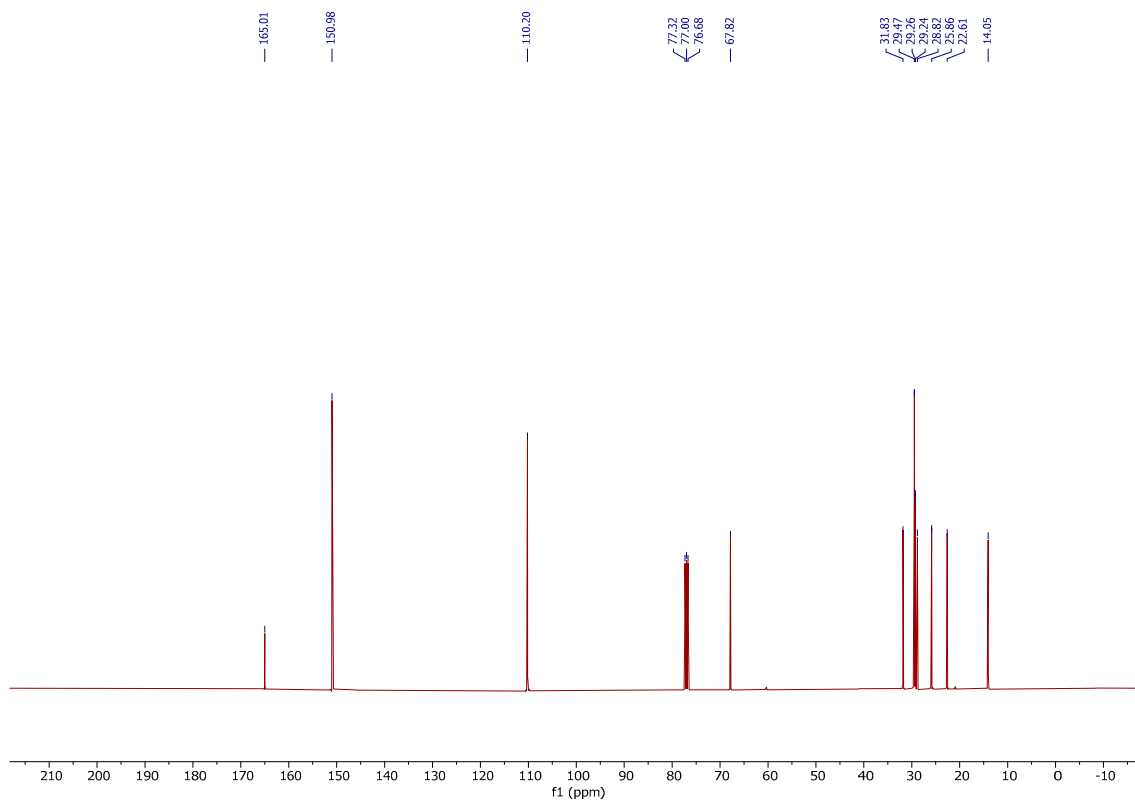

**Figure S4. (A)  $^1\text{H}$ -NMR (400 MHz,  $\text{CDCl}_3$ ) and (B)  $^{13}\text{C}$  NMR (100.6 MHz,  $\text{CDCl}_3$ ) spectra of 4-Decyloxy pyridine.**

**A.**

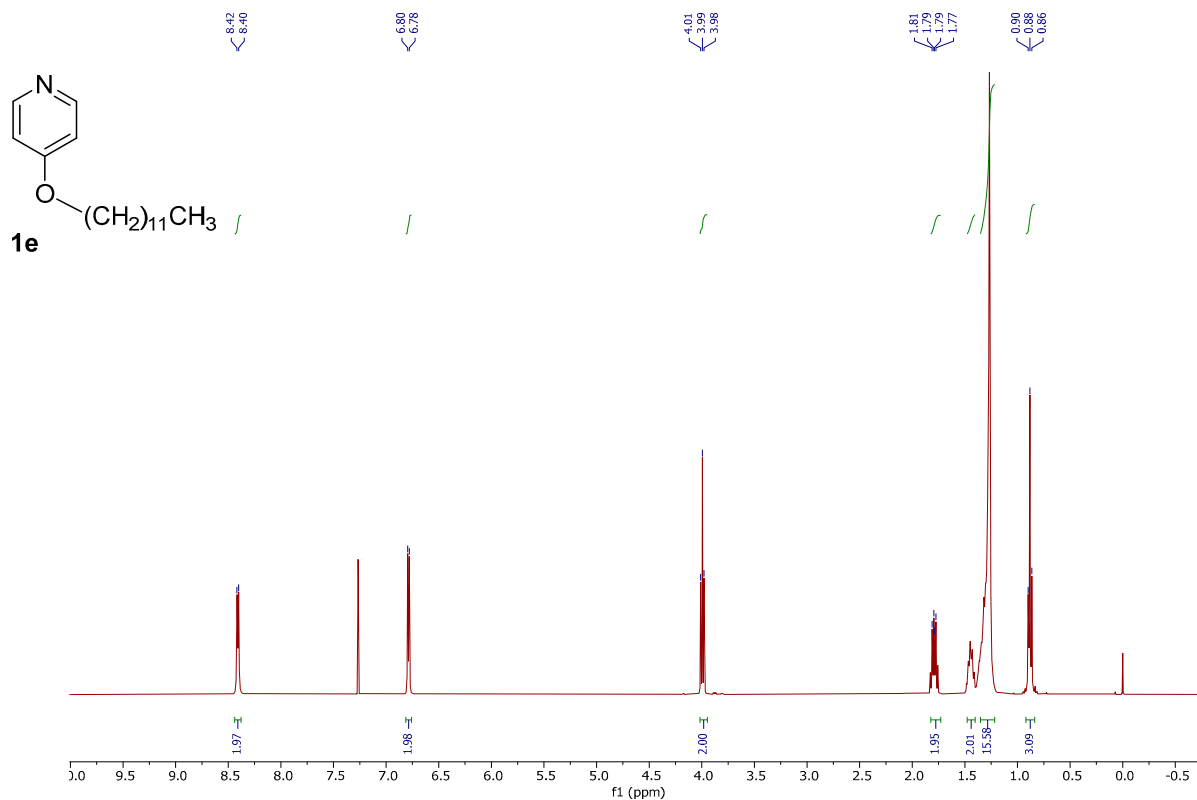

**B.**

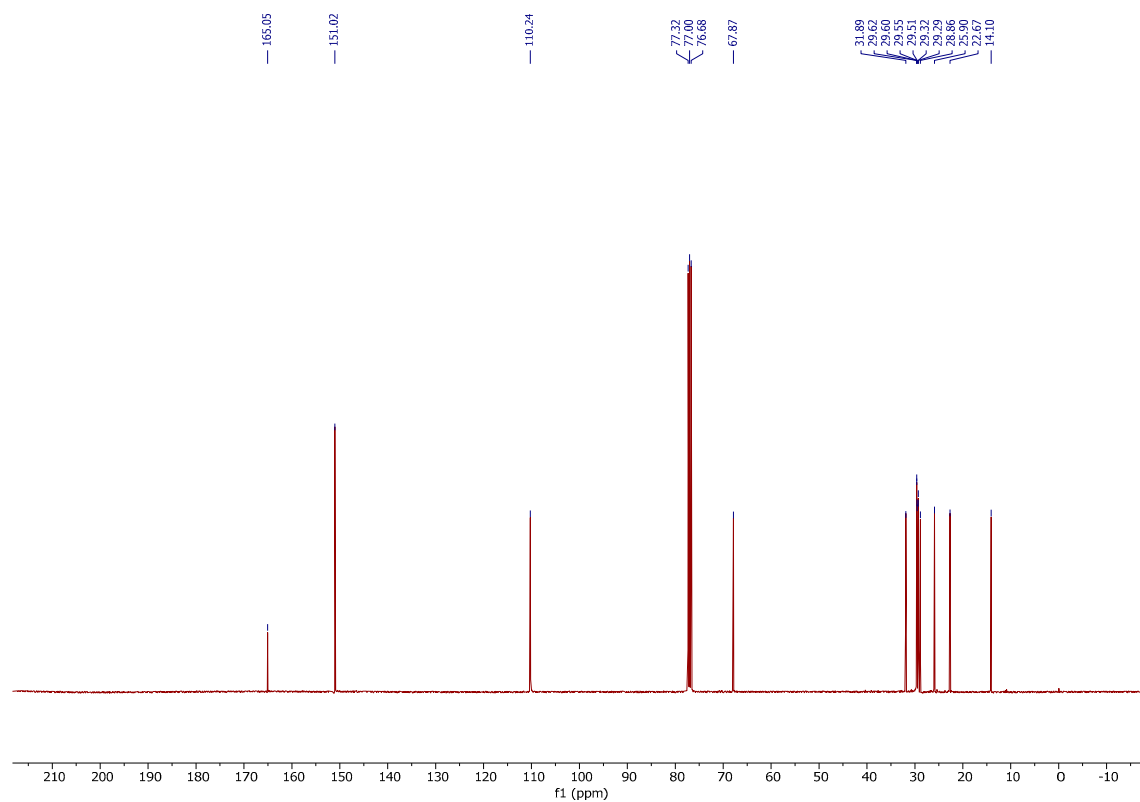

**Figure S5. (A) <sup>1</sup>H-NMR (400 MHz, CDCl<sub>3</sub>) and (B) <sup>13</sup>C NMR (100.6 MHz, CDCl<sub>3</sub>) spectra of 4-Dodecyloxy pyridine.**

**A.**

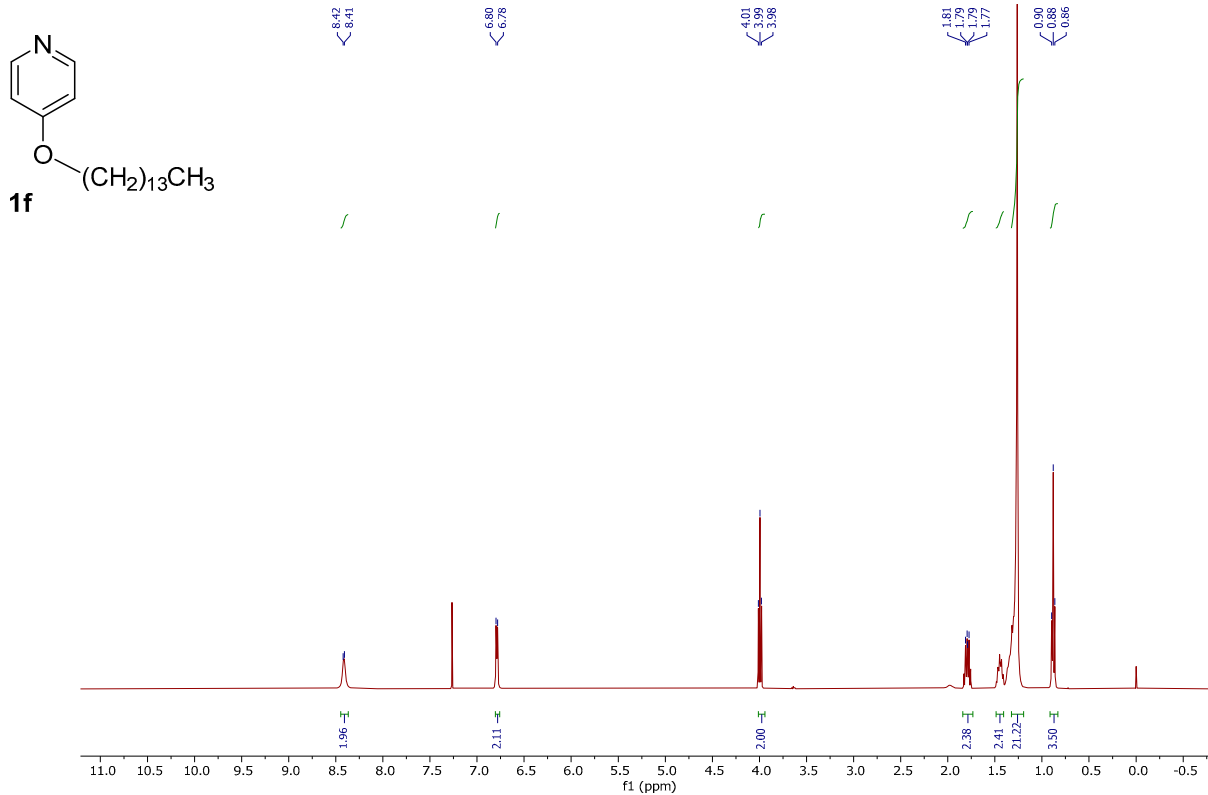

**B.**

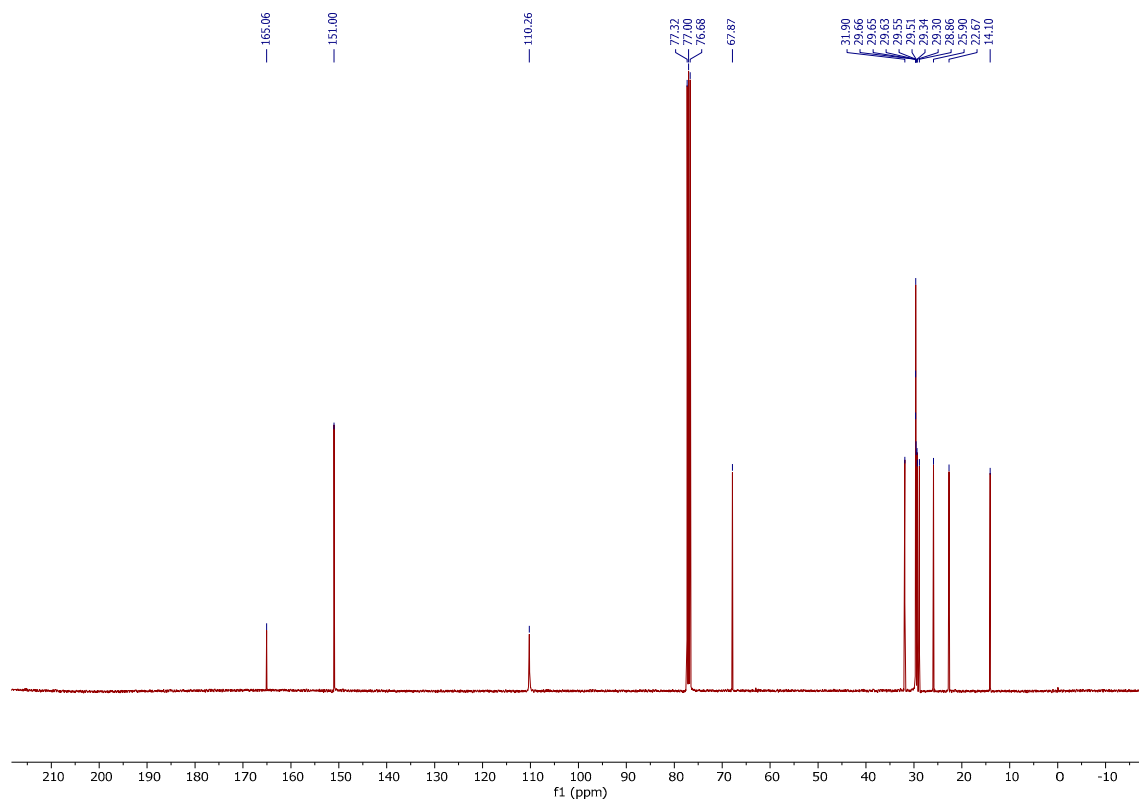

Figure S6. (A) <sup>1</sup>H-NMR (400 MHz, CDCl<sub>3</sub>) and (B) <sup>13</sup>C NMR (100.6 MHz, CDCl<sub>3</sub>) spectra of 4-Tetradecyloxypyridine.

**A.**

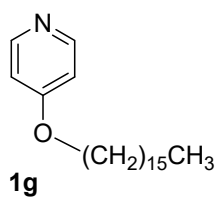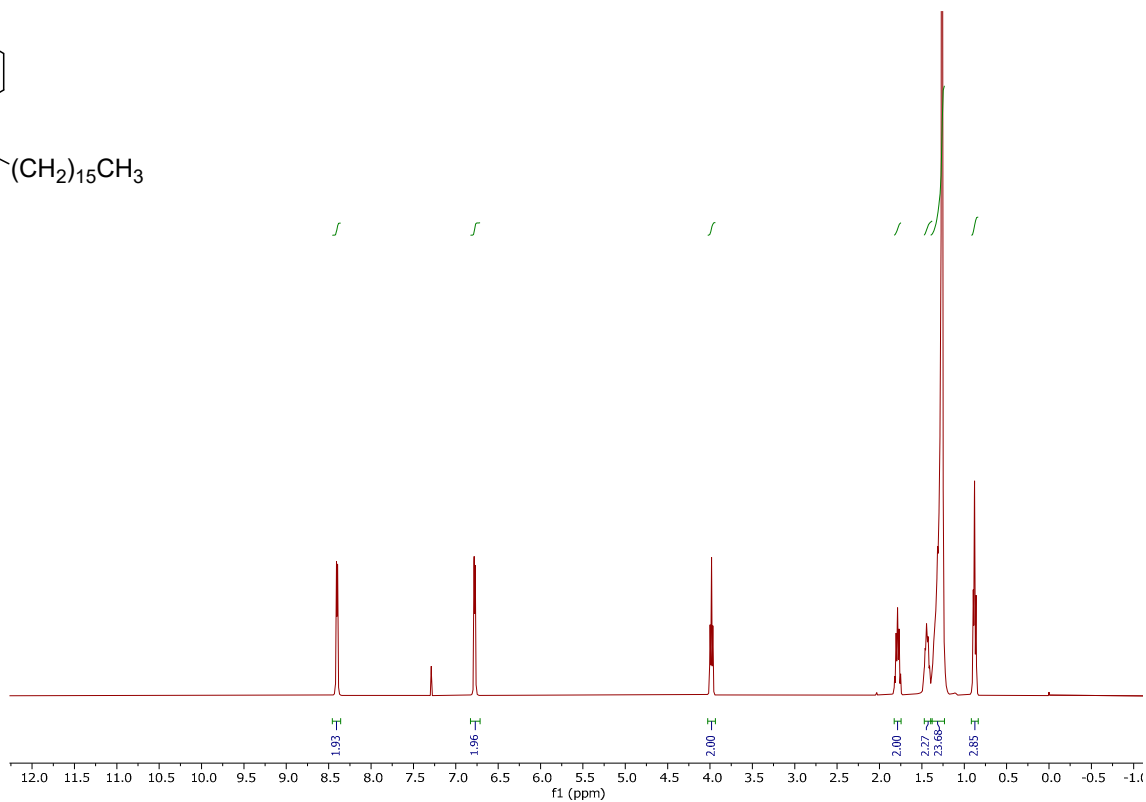

**B.**

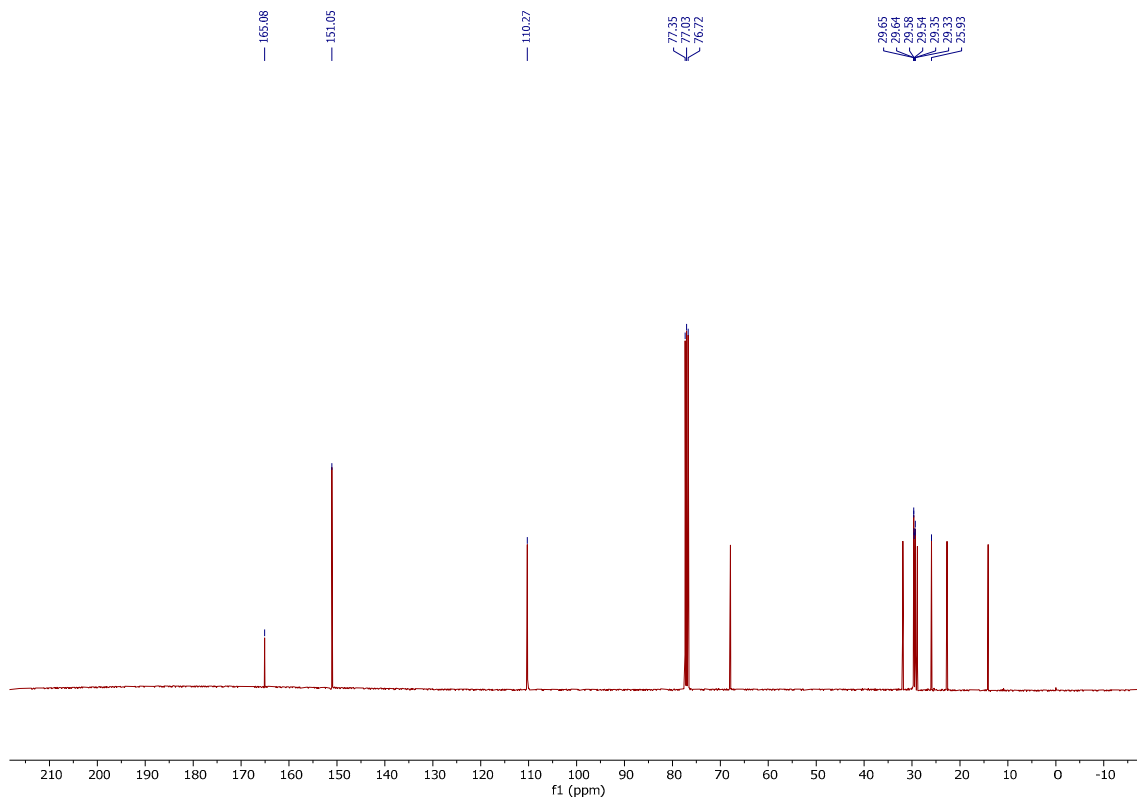

**Figure S7. (A) <sup>1</sup>H-NMR (400 MHz, CDCl<sub>3</sub>) and (B) <sup>13</sup>C NMR (100.6 MHz, CDCl<sub>3</sub>) spectra of 4-Hexadecyloxy pyridine.**

**A.**

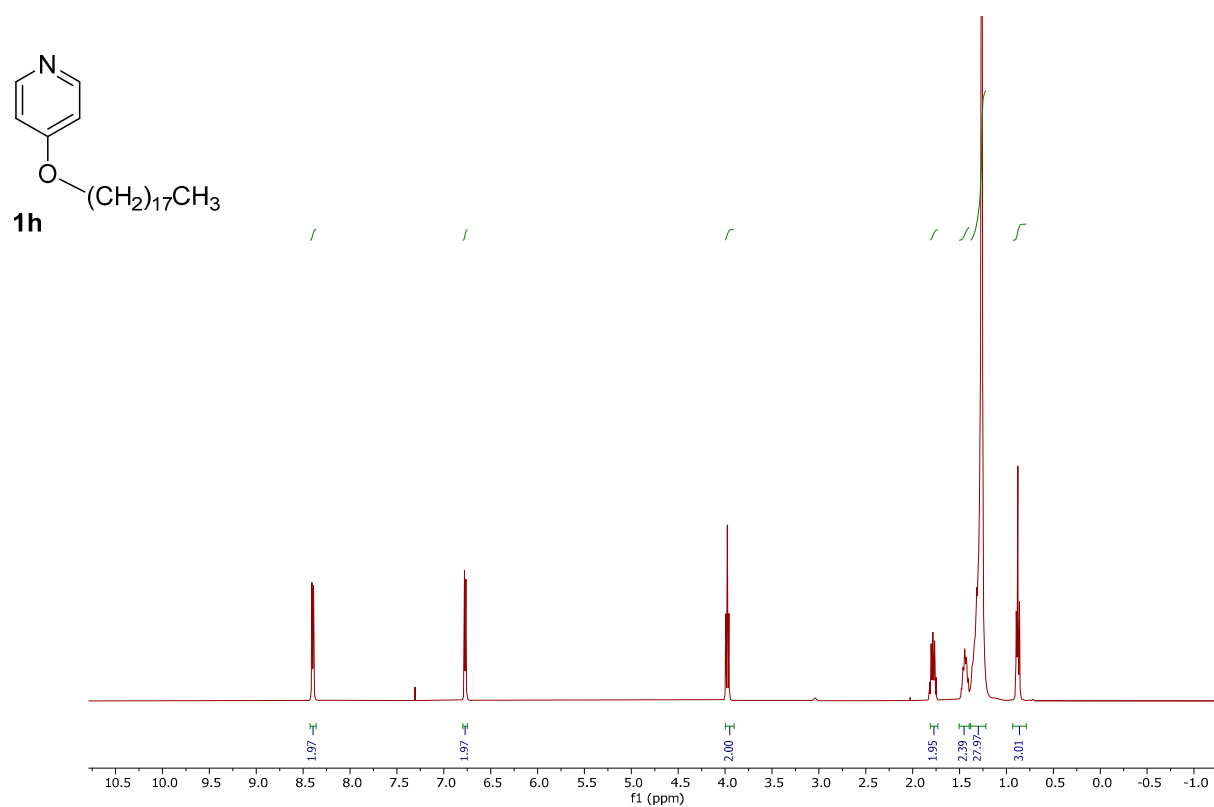

**Figure S8. (A) <sup>1</sup>H-NMR (400 MHz, CDCl<sub>3</sub>) spectra of 4-Octadecyloxy pyridine.**

**A.**

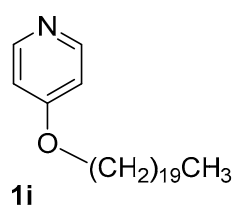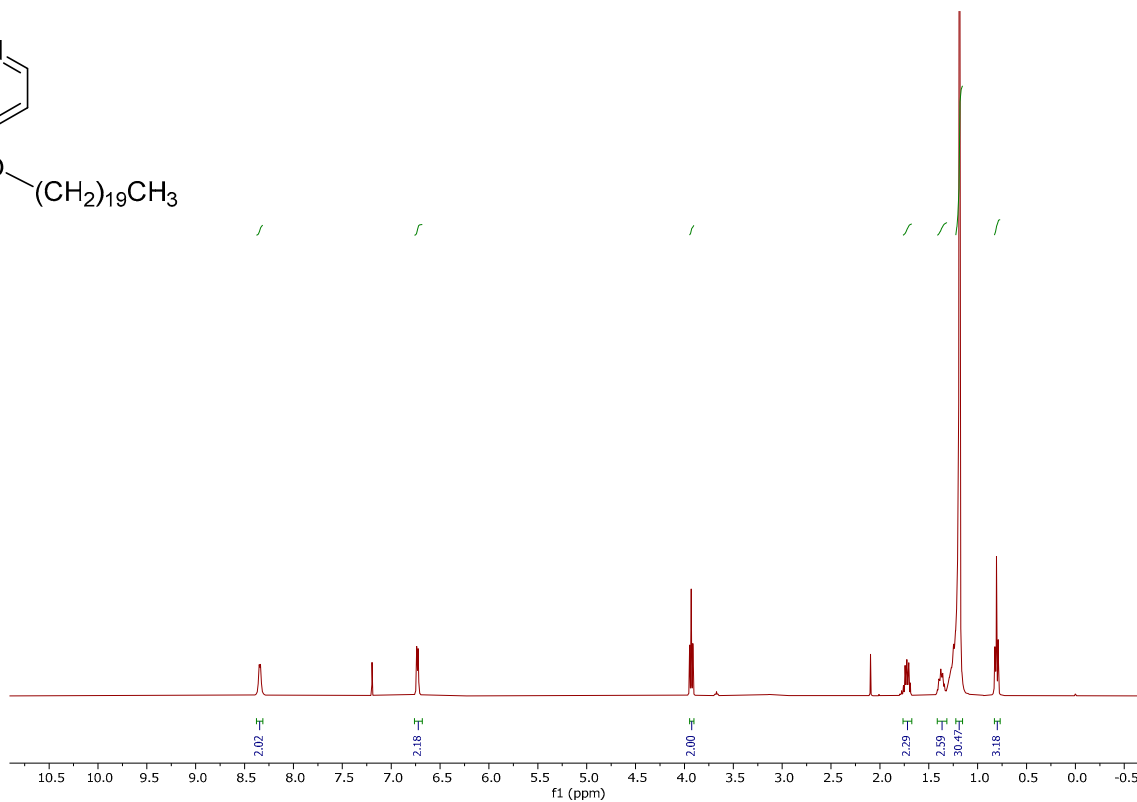

**B.**

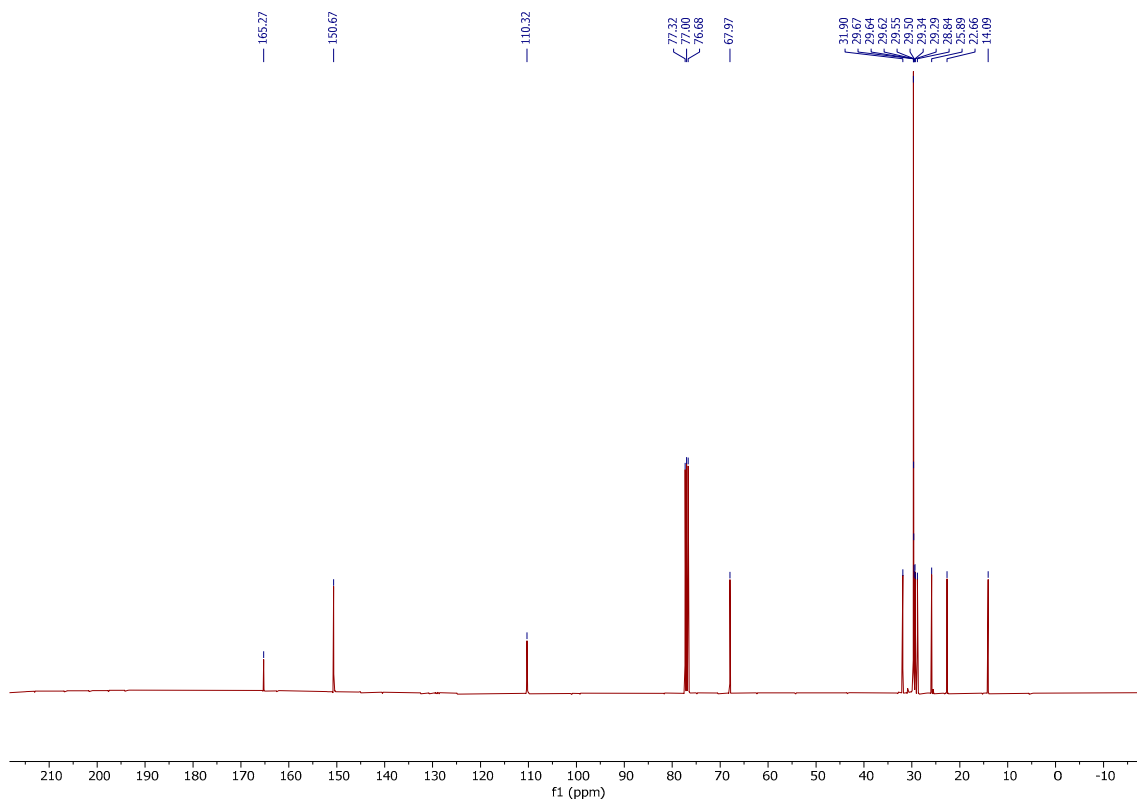

**Figure S9. (A) <sup>1</sup>H-NMR (400 MHz, CDCl<sub>3</sub>) and (B) <sup>13</sup>C NMR (100.6 MHz, CDCl<sub>3</sub>) spectra of 4-Eicosanoyloxy pyridine.**

**A.**

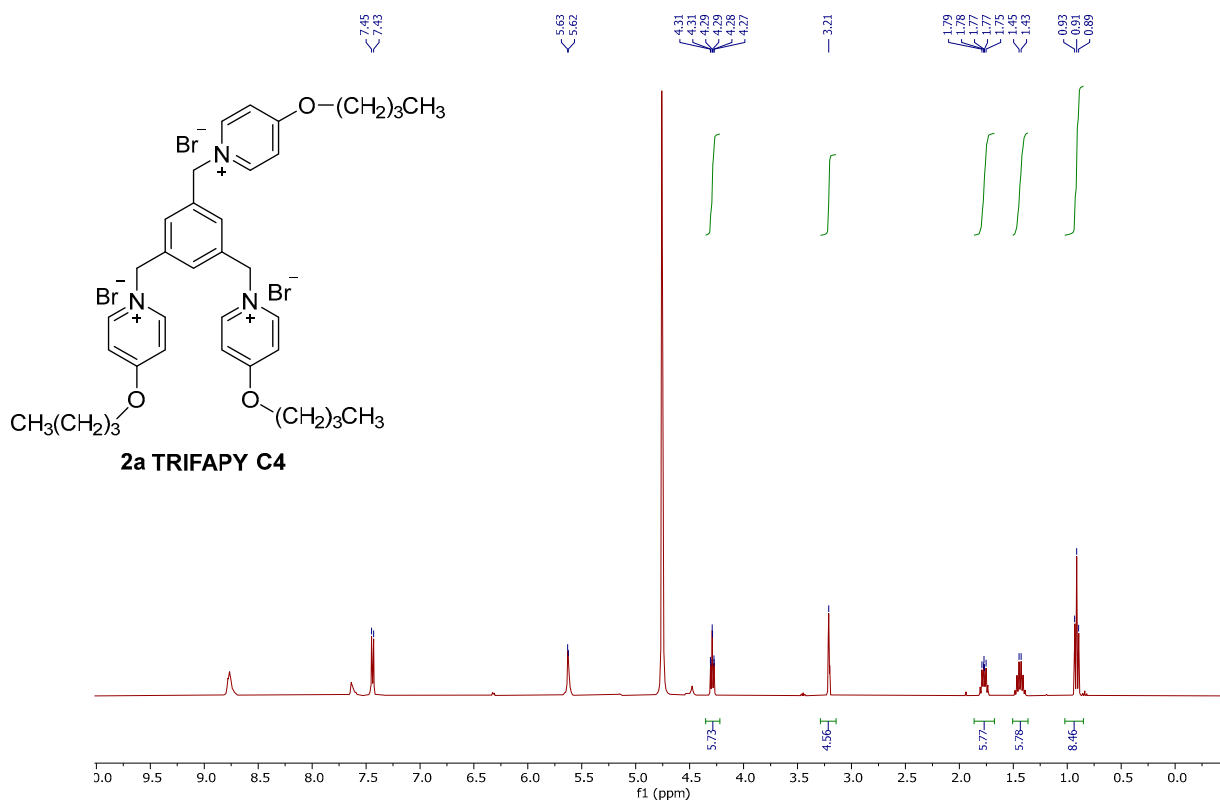

**B.**

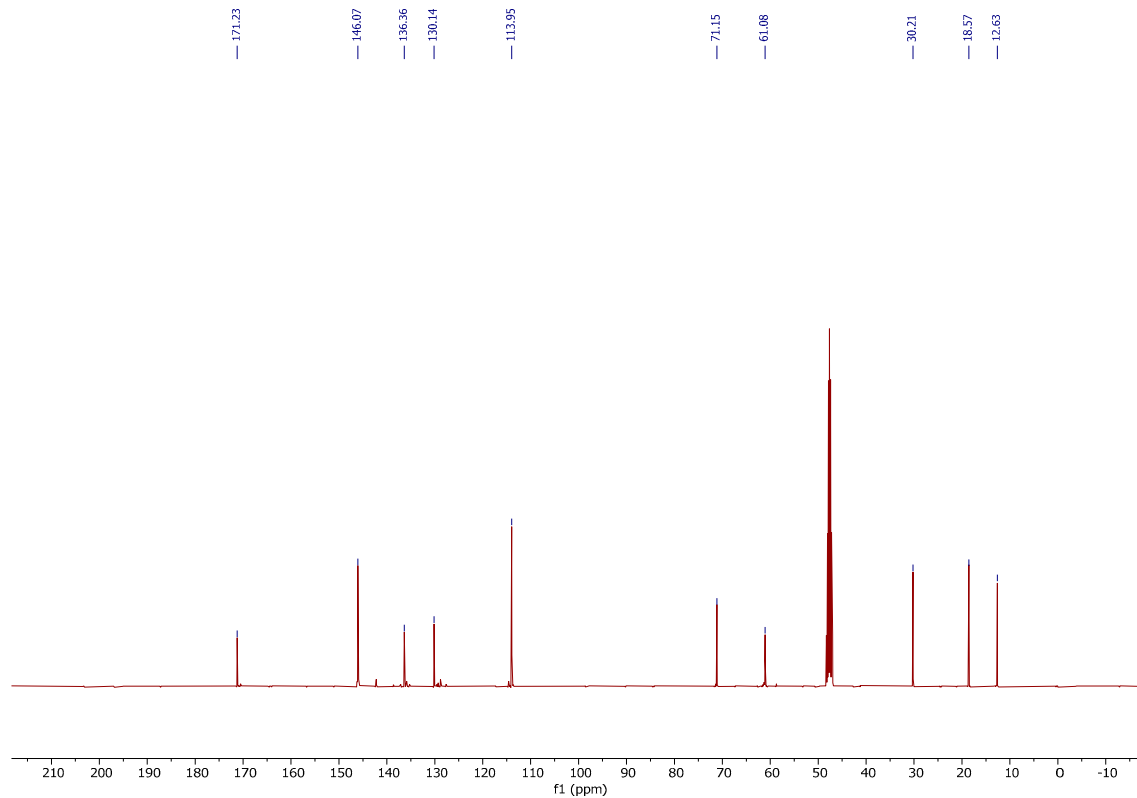

**Figure S10. (A) <sup>1</sup>H-NMR (400 MHz, CD<sub>3</sub>OD) and (B) <sup>13</sup>C NMR (100.6 MHz, CD<sub>3</sub>OD) spectra of 1,3,5-Tris(4-butoxypyridiniummethyl)benzene tribromide.**

**A.**

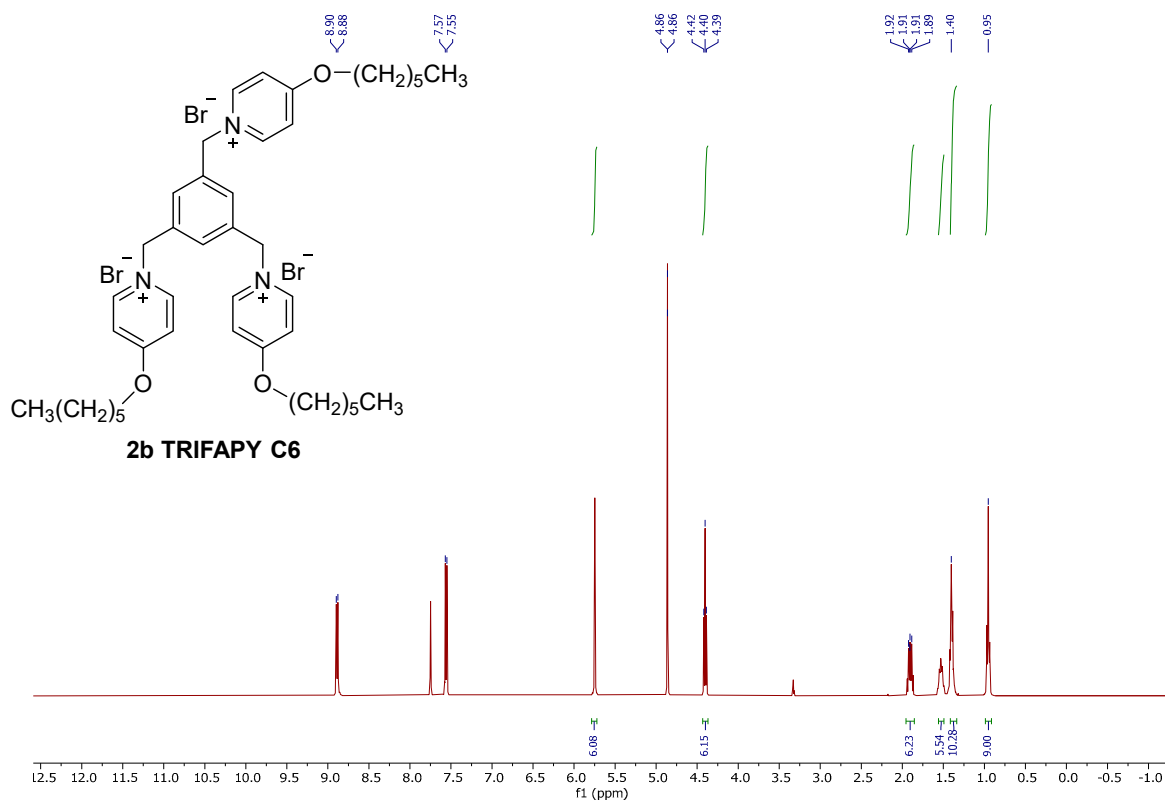

**B.**

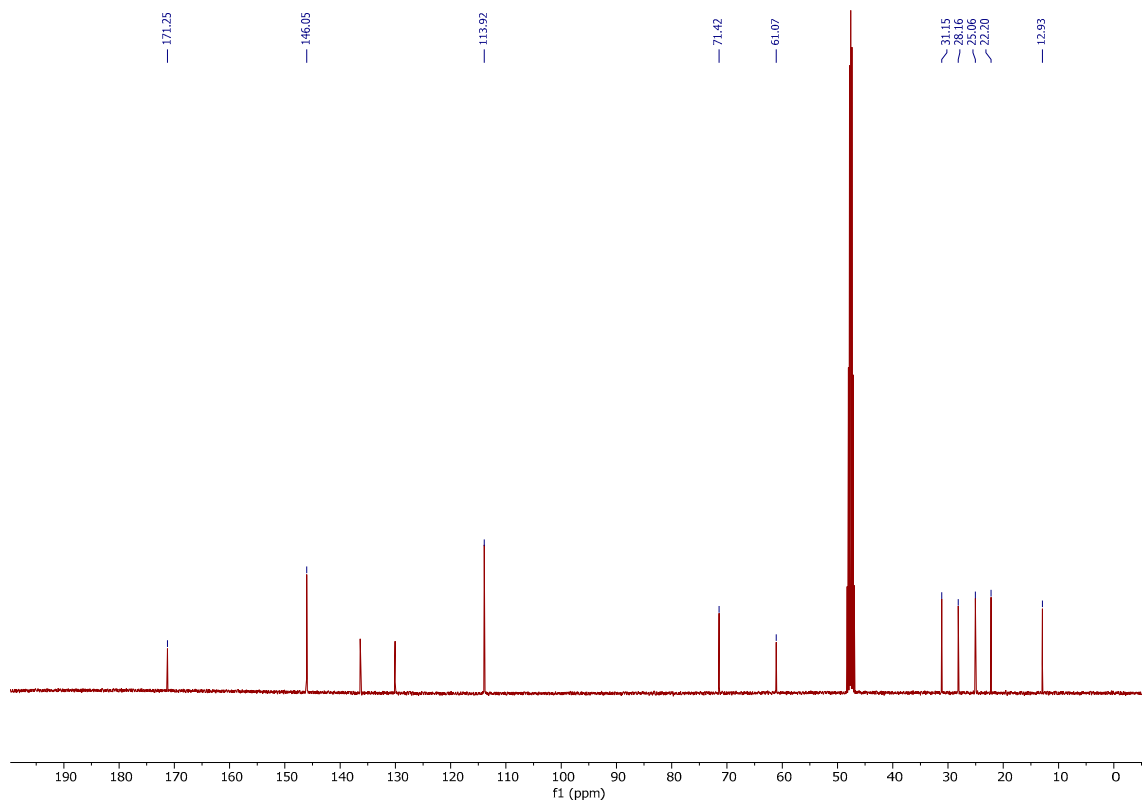

**Figure S11. (A) <sup>1</sup>H-NMR (400 MHz, CD<sub>3</sub>OD) and (B) <sup>13</sup>C NMR (100.6 MHz, CD<sub>3</sub>OD) spectra of 1,3,5-Tris(4-hexyloxypyridiniummethyl)benzene tribromide.**

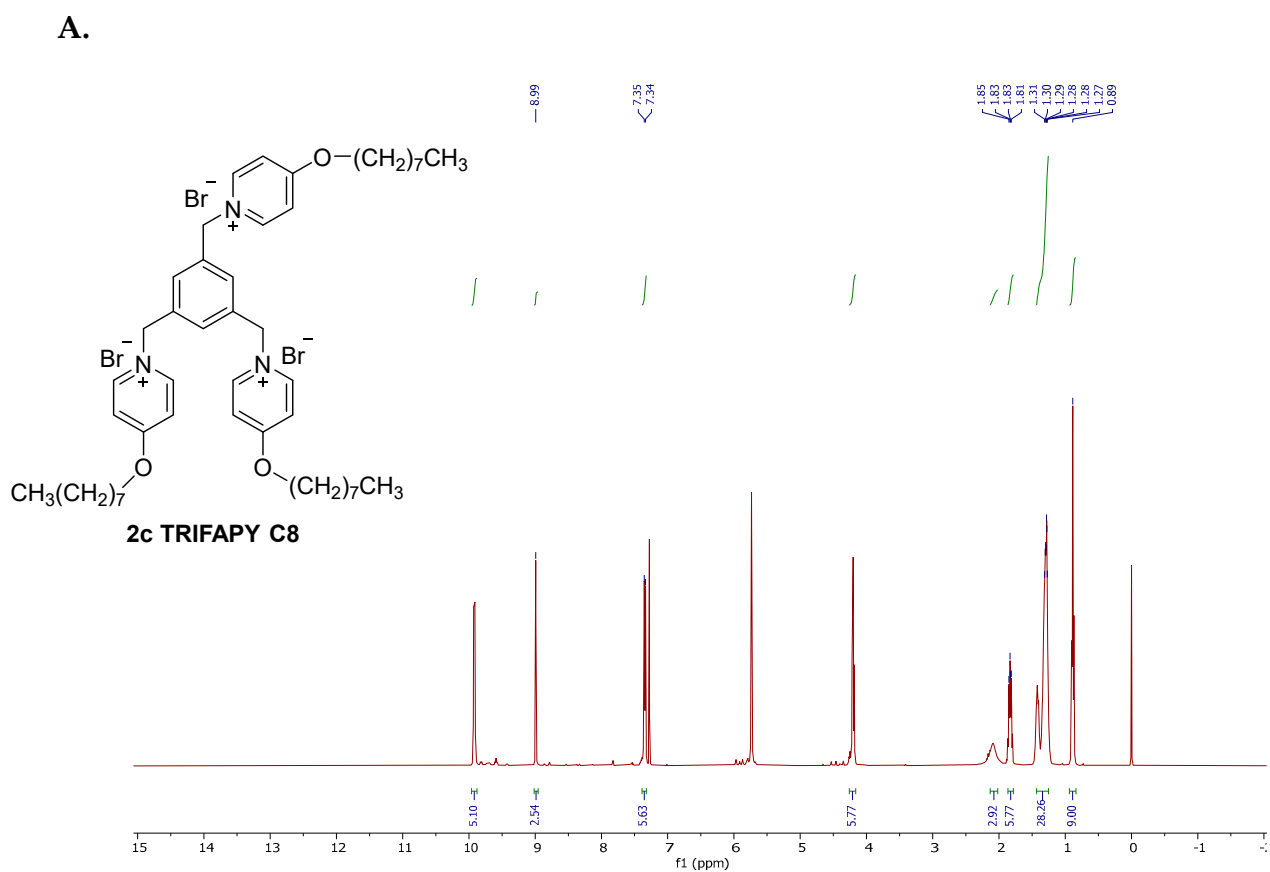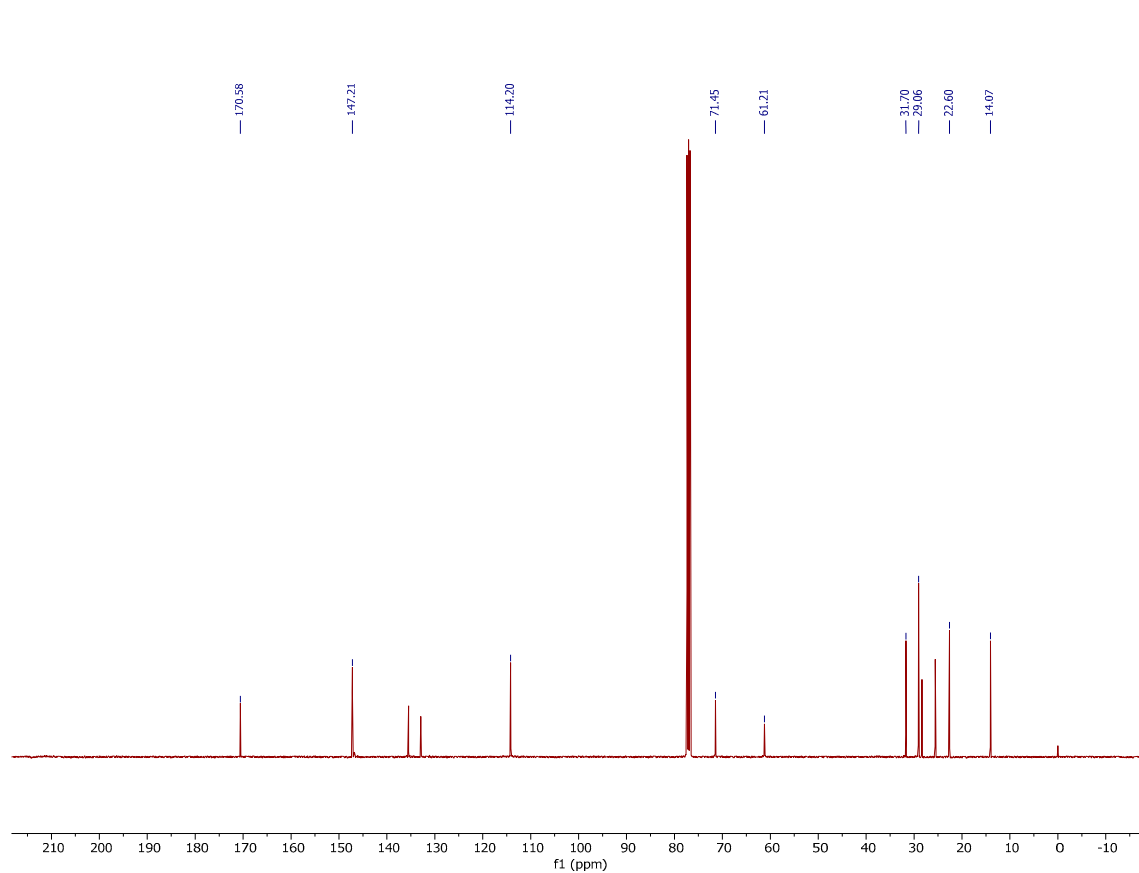

**Figure S12. (A)  $^1\text{H}$ -NMR (400 MHz,  $\text{CDCl}_3$ ) and (B)  $^{13}\text{C}$  NMR (100.6 MHz,  $\text{CDCl}_3$ ) spectra of 1,3,5-Tris(4-octyloxypyridiniummethyl)benzene tribromide.**

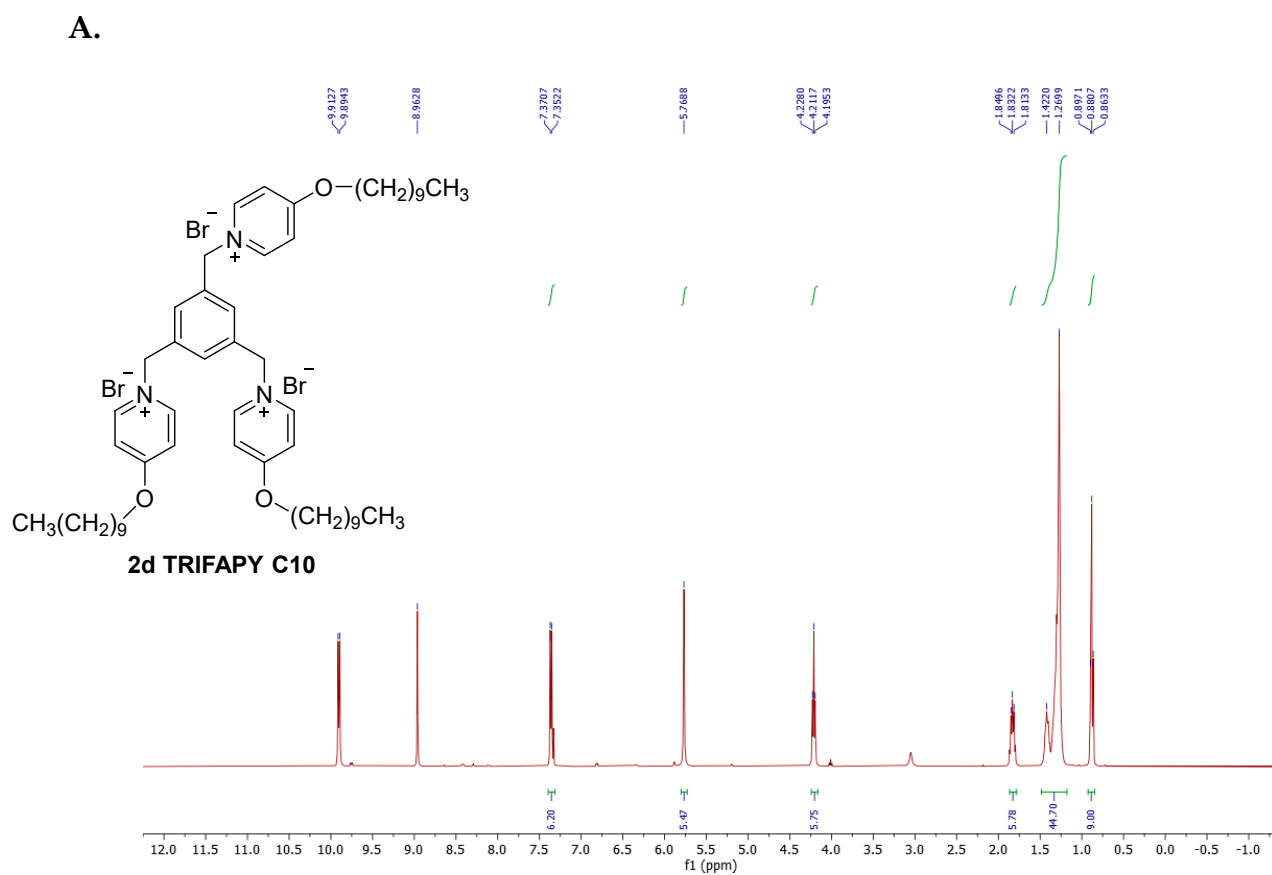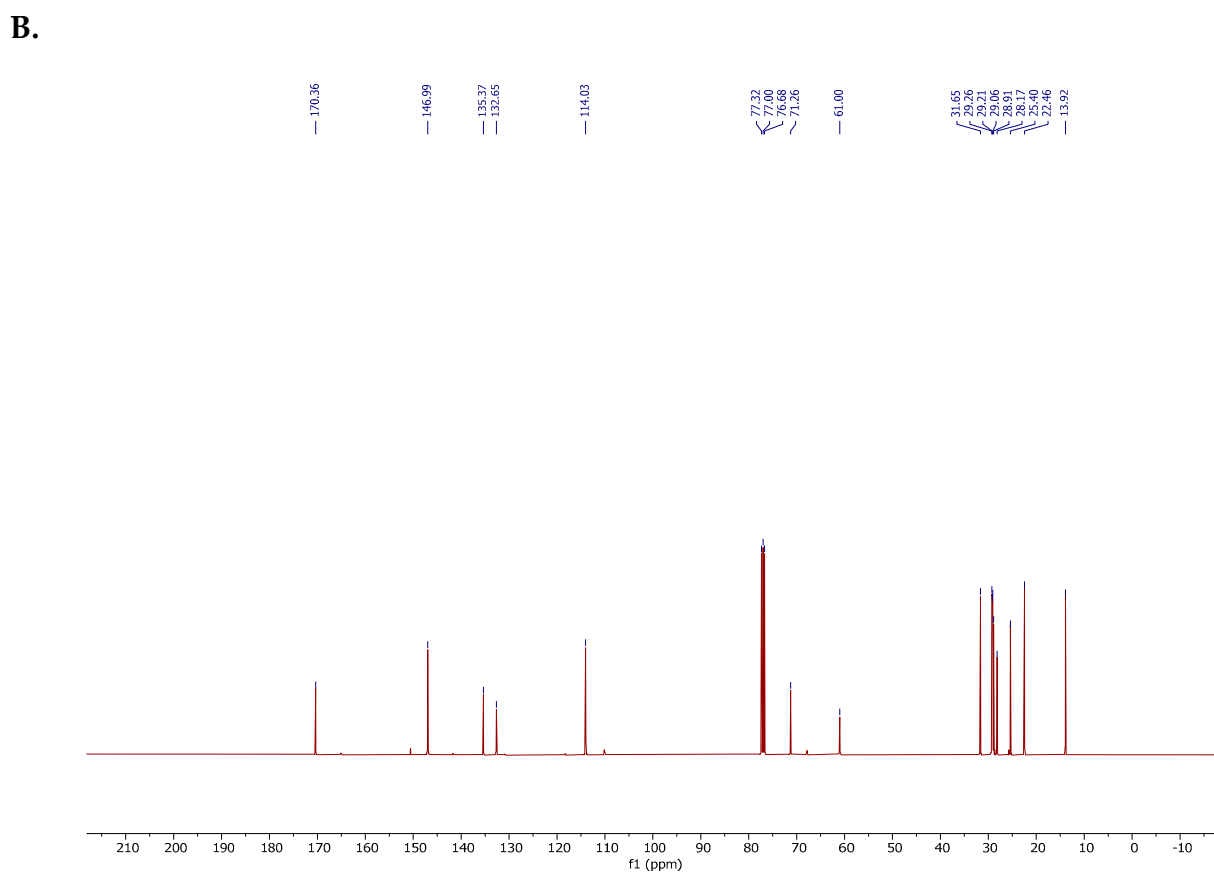

**Figure S13. (A)  $^1\text{H}$ -NMR (400 MHz,  $\text{CDCl}_3$ ) and (B)  $^{13}\text{C}$  NMR (100.6 MHz,  $\text{CDCl}_3$ ) spectra of 1,3,5-Tris(4-decyloxybenzylpyridinium)methylbenzene tribromide.**

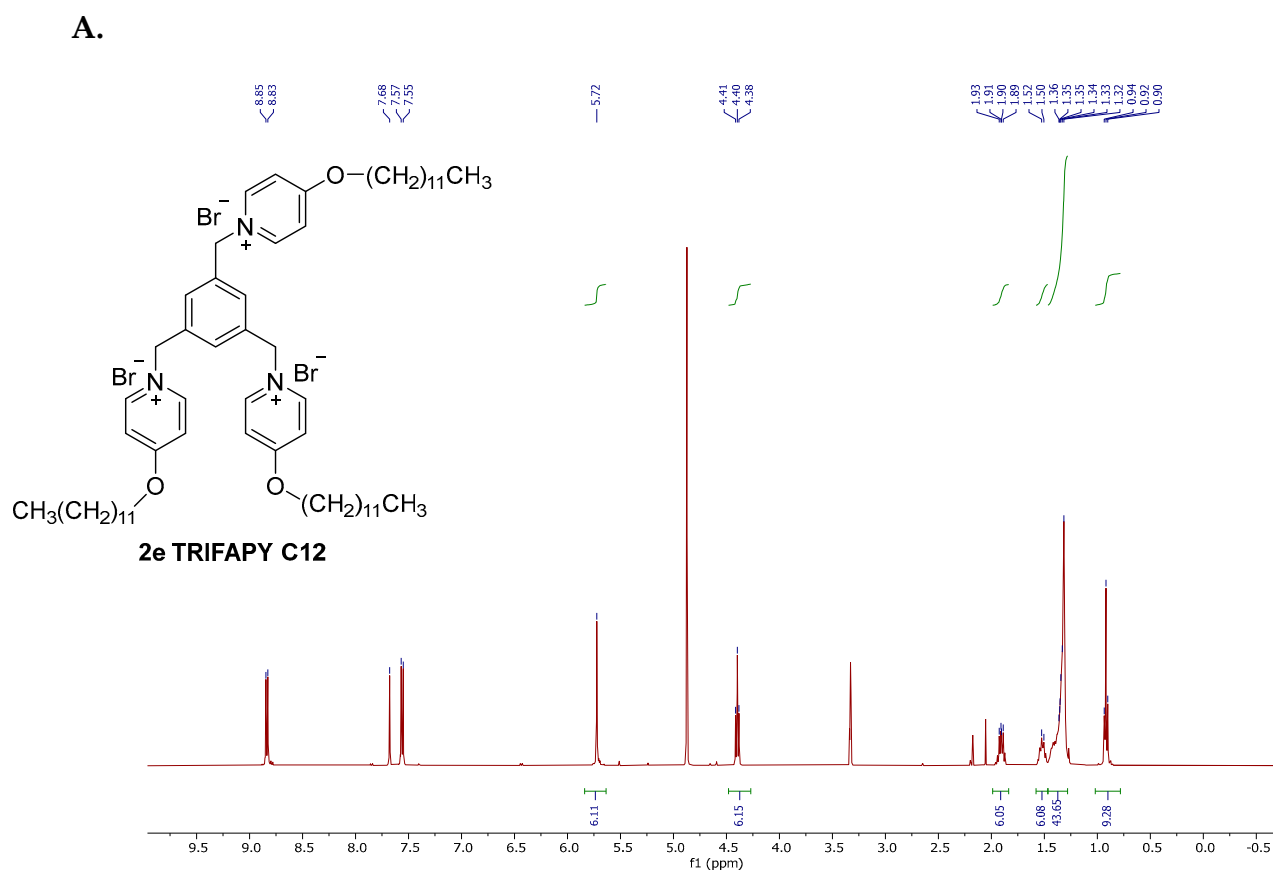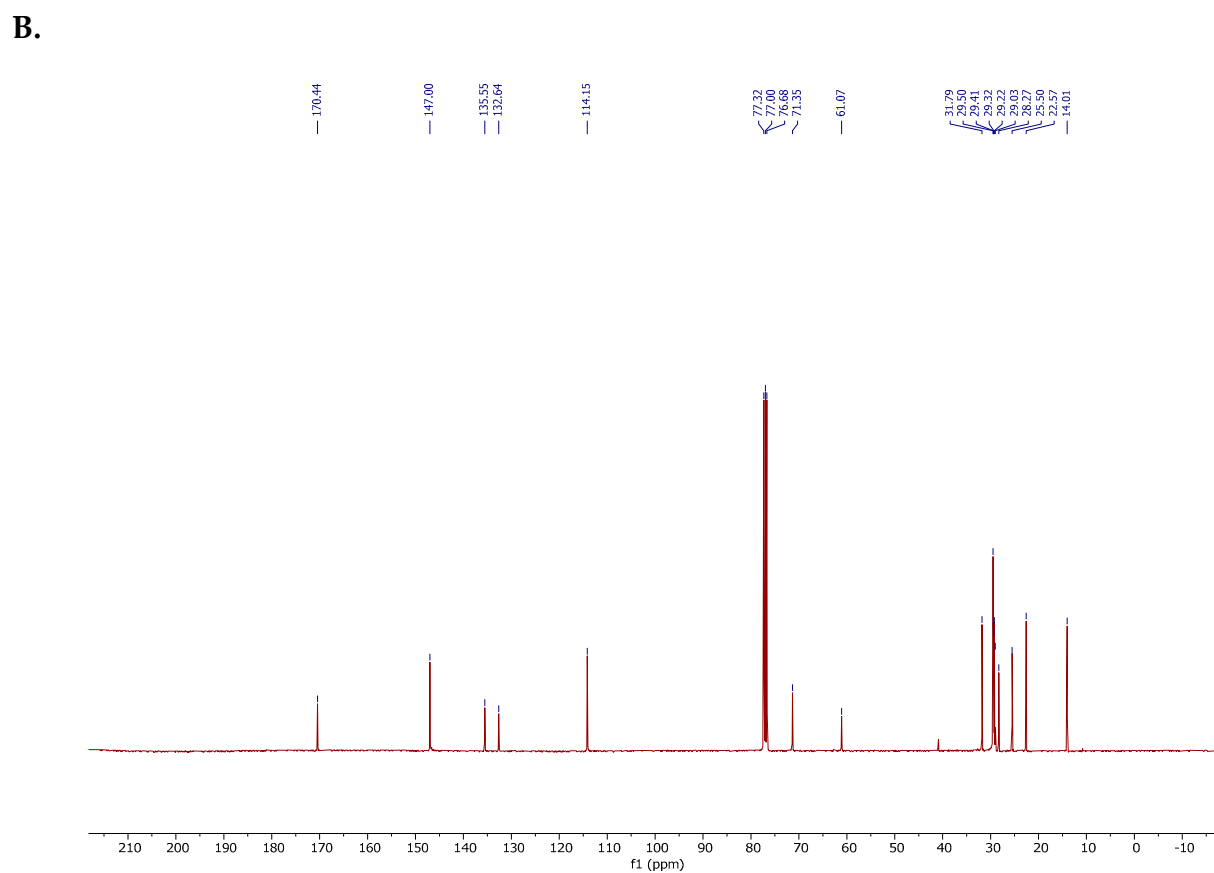

Figure S14. (A)  $^1\text{H}$ -NMR (400 MHz,  $\text{CD}_3\text{OD}$ ) and (B)  $^{13}\text{C}$  NMR (100.6 MHz,  $\text{CD}_3\text{OD}$ ) spectra of 1,3,5-Tris(4-dodecyloxypyridiniummethyl)benzene tribromide.

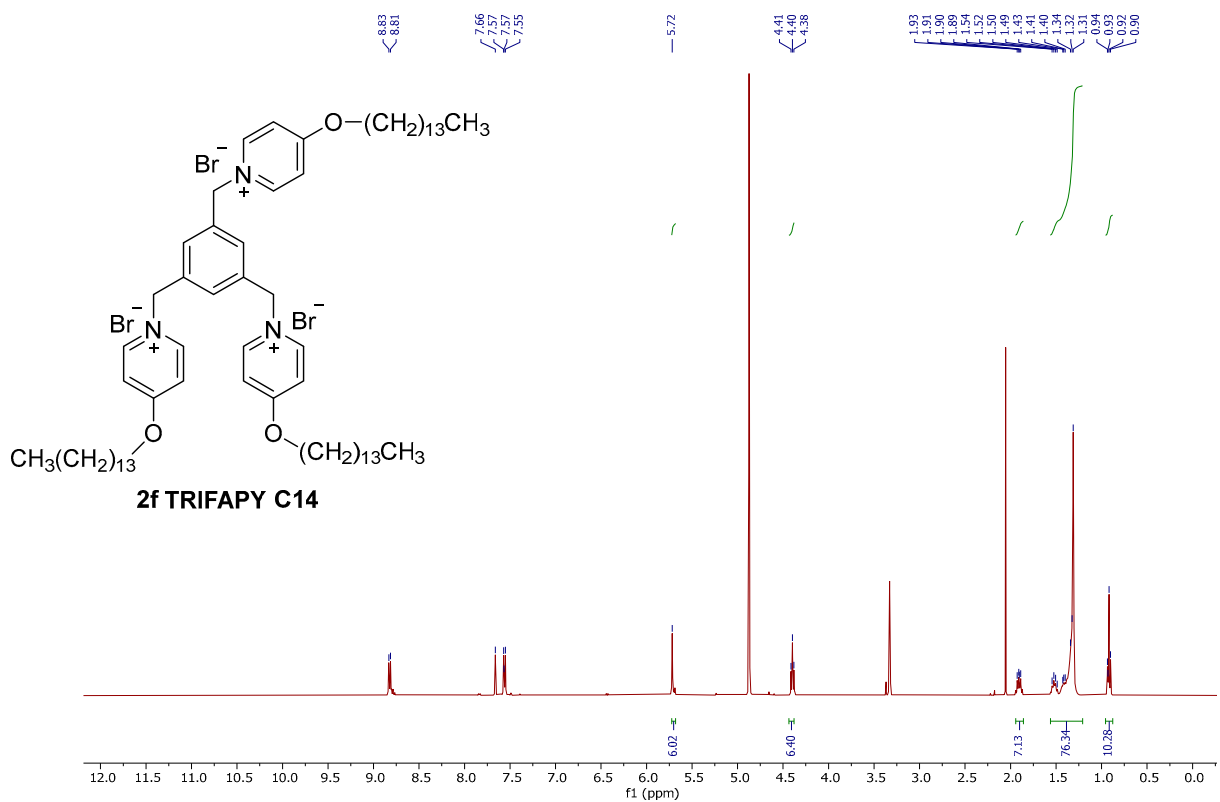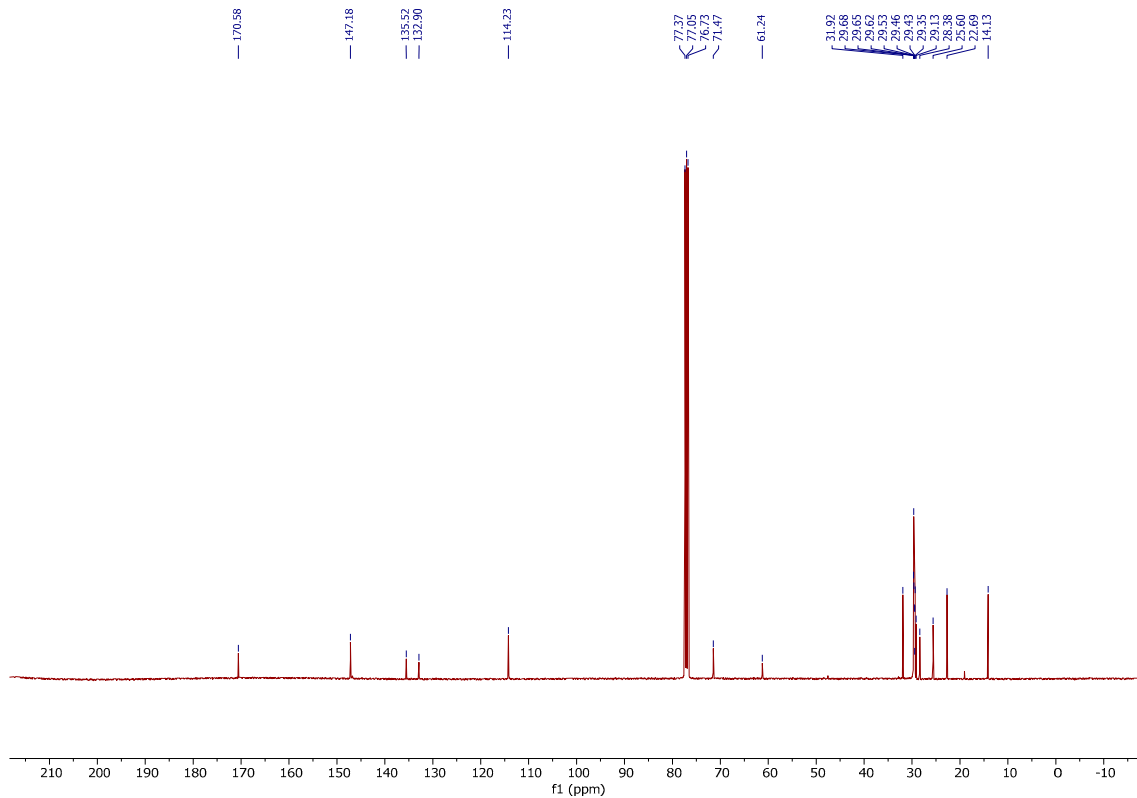

**Figure S15. (A)  $^1\text{H}$ -NMR (400 MHz,  $\text{CD}_3\text{OD}$ ) and (B)  $^{13}\text{C}$  NMR (100.6 MHz,  $\text{CDCl}_3$ ) spectra of 1,3,5-Tris(4-tetradecyloxy pyridiniumethyl)benzene tribromide.**

**A.**

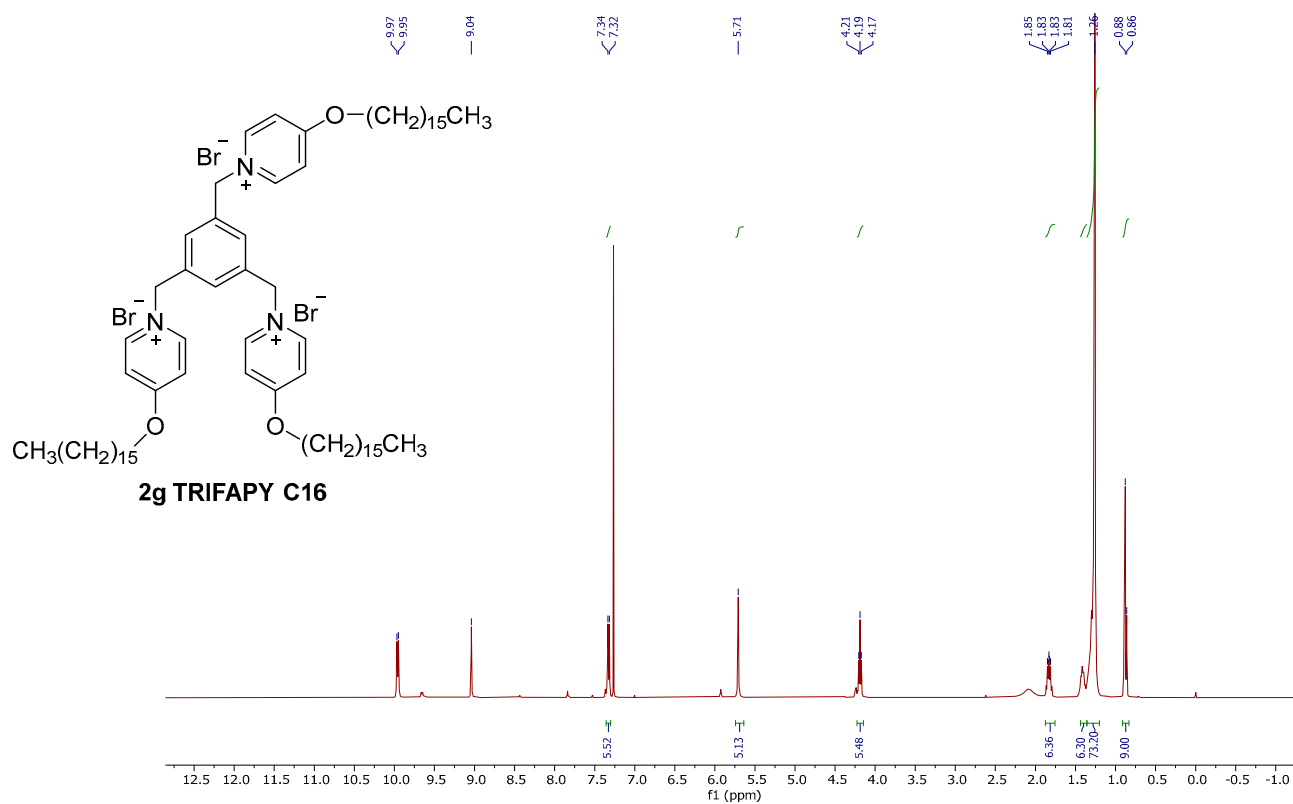

**B.**

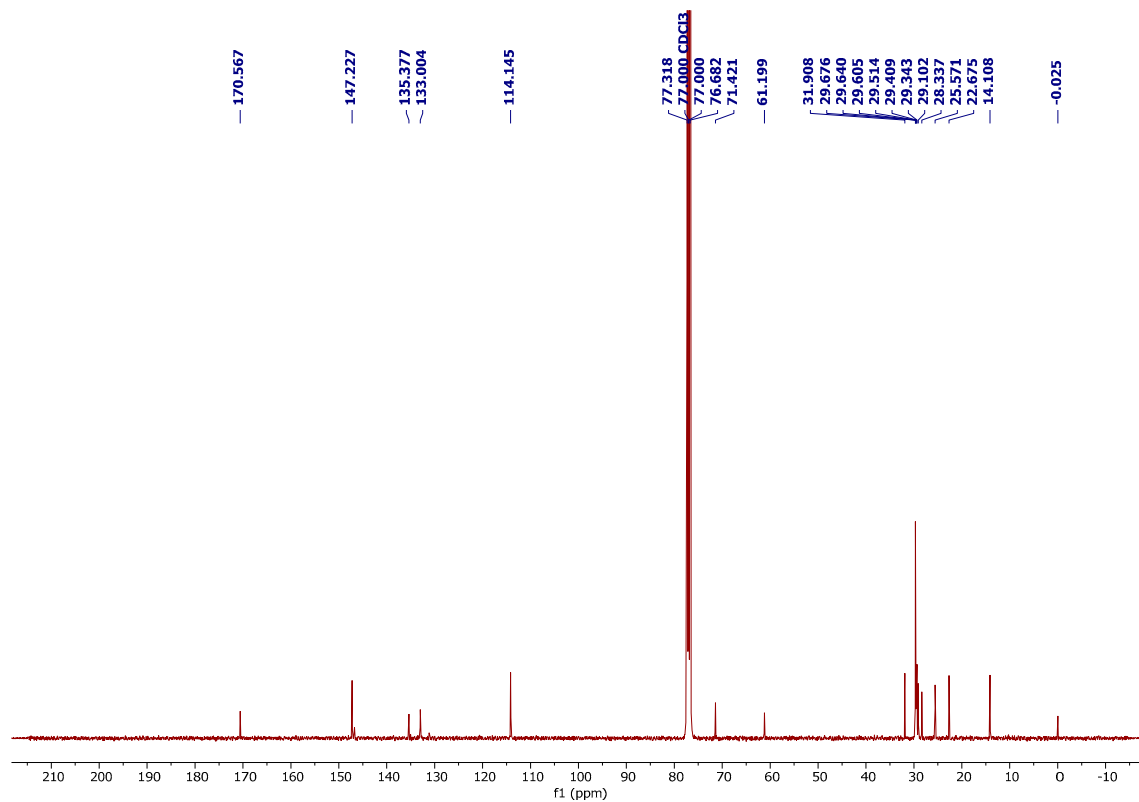

**Figure S16. (A) <sup>1</sup>H-NMR (400 MHz, CDCl<sub>3</sub>) and (B) <sup>13</sup>C NMR (100.6 MHz, CDCl<sub>3</sub>) spectra of 1,3,5-Tris(4-hexadecyloxy-pyridinium-methyl)benzene tribromide.**

**A.**

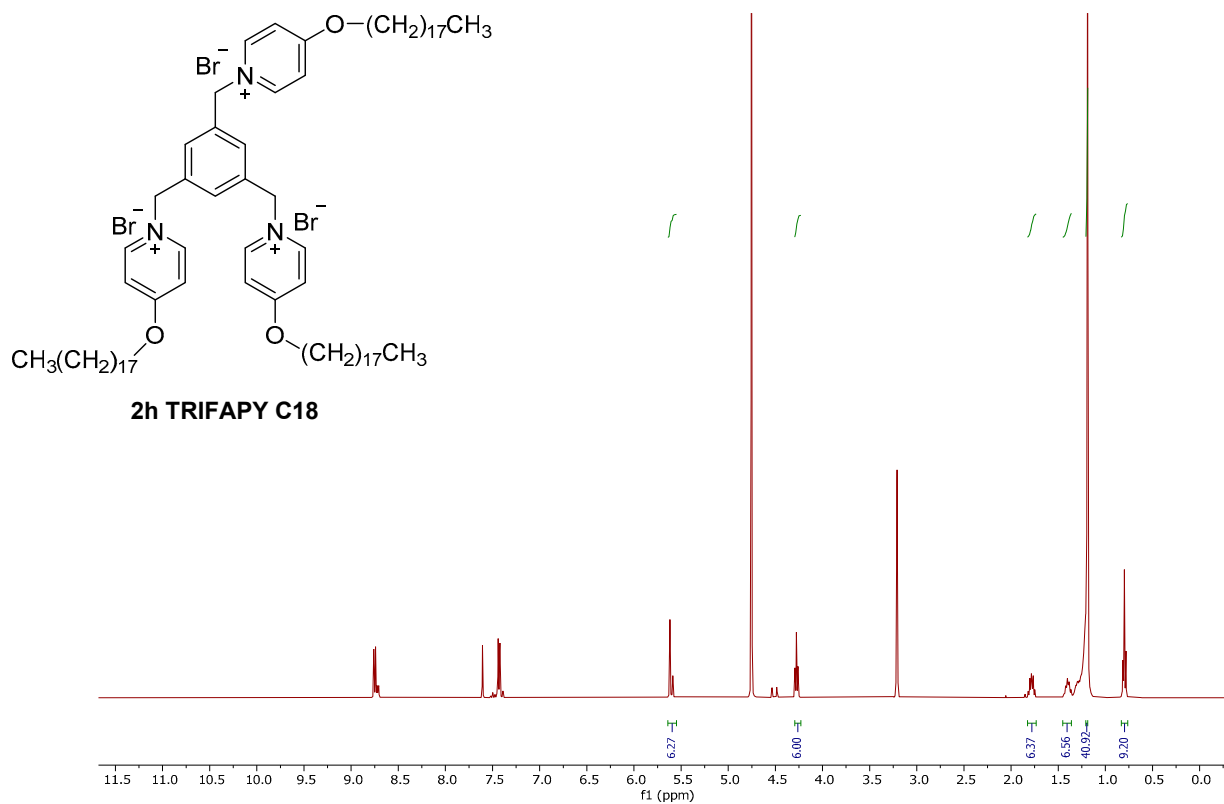

**B.**

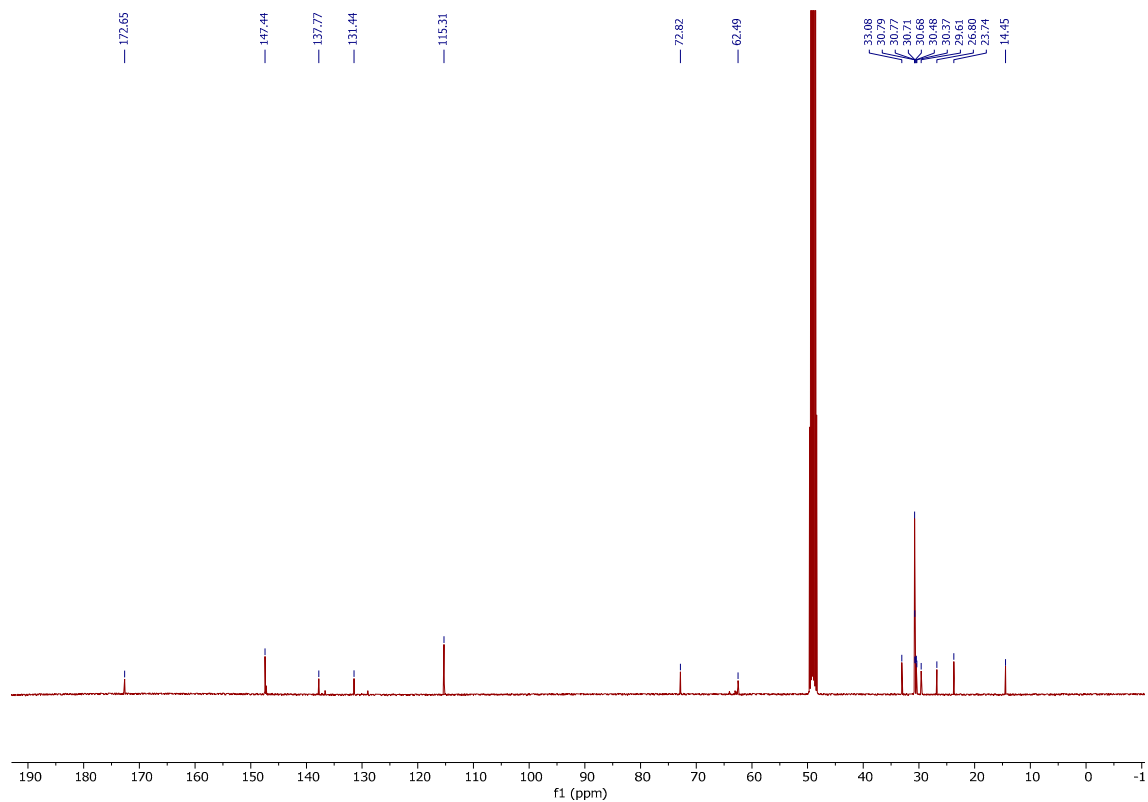

**Figure S17. (A)  $^1\text{H}$ -NMR (400 MHz,  $\text{CD}_3\text{OD}$ ) and (B)  $^{13}\text{C}$  NMR (100.6 MHz,  $\text{CD}_3\text{OD}$ ) spectra of 1,3,5-Tris(4-octadecyloxypyridiniummethyl)benzene tribromide.**

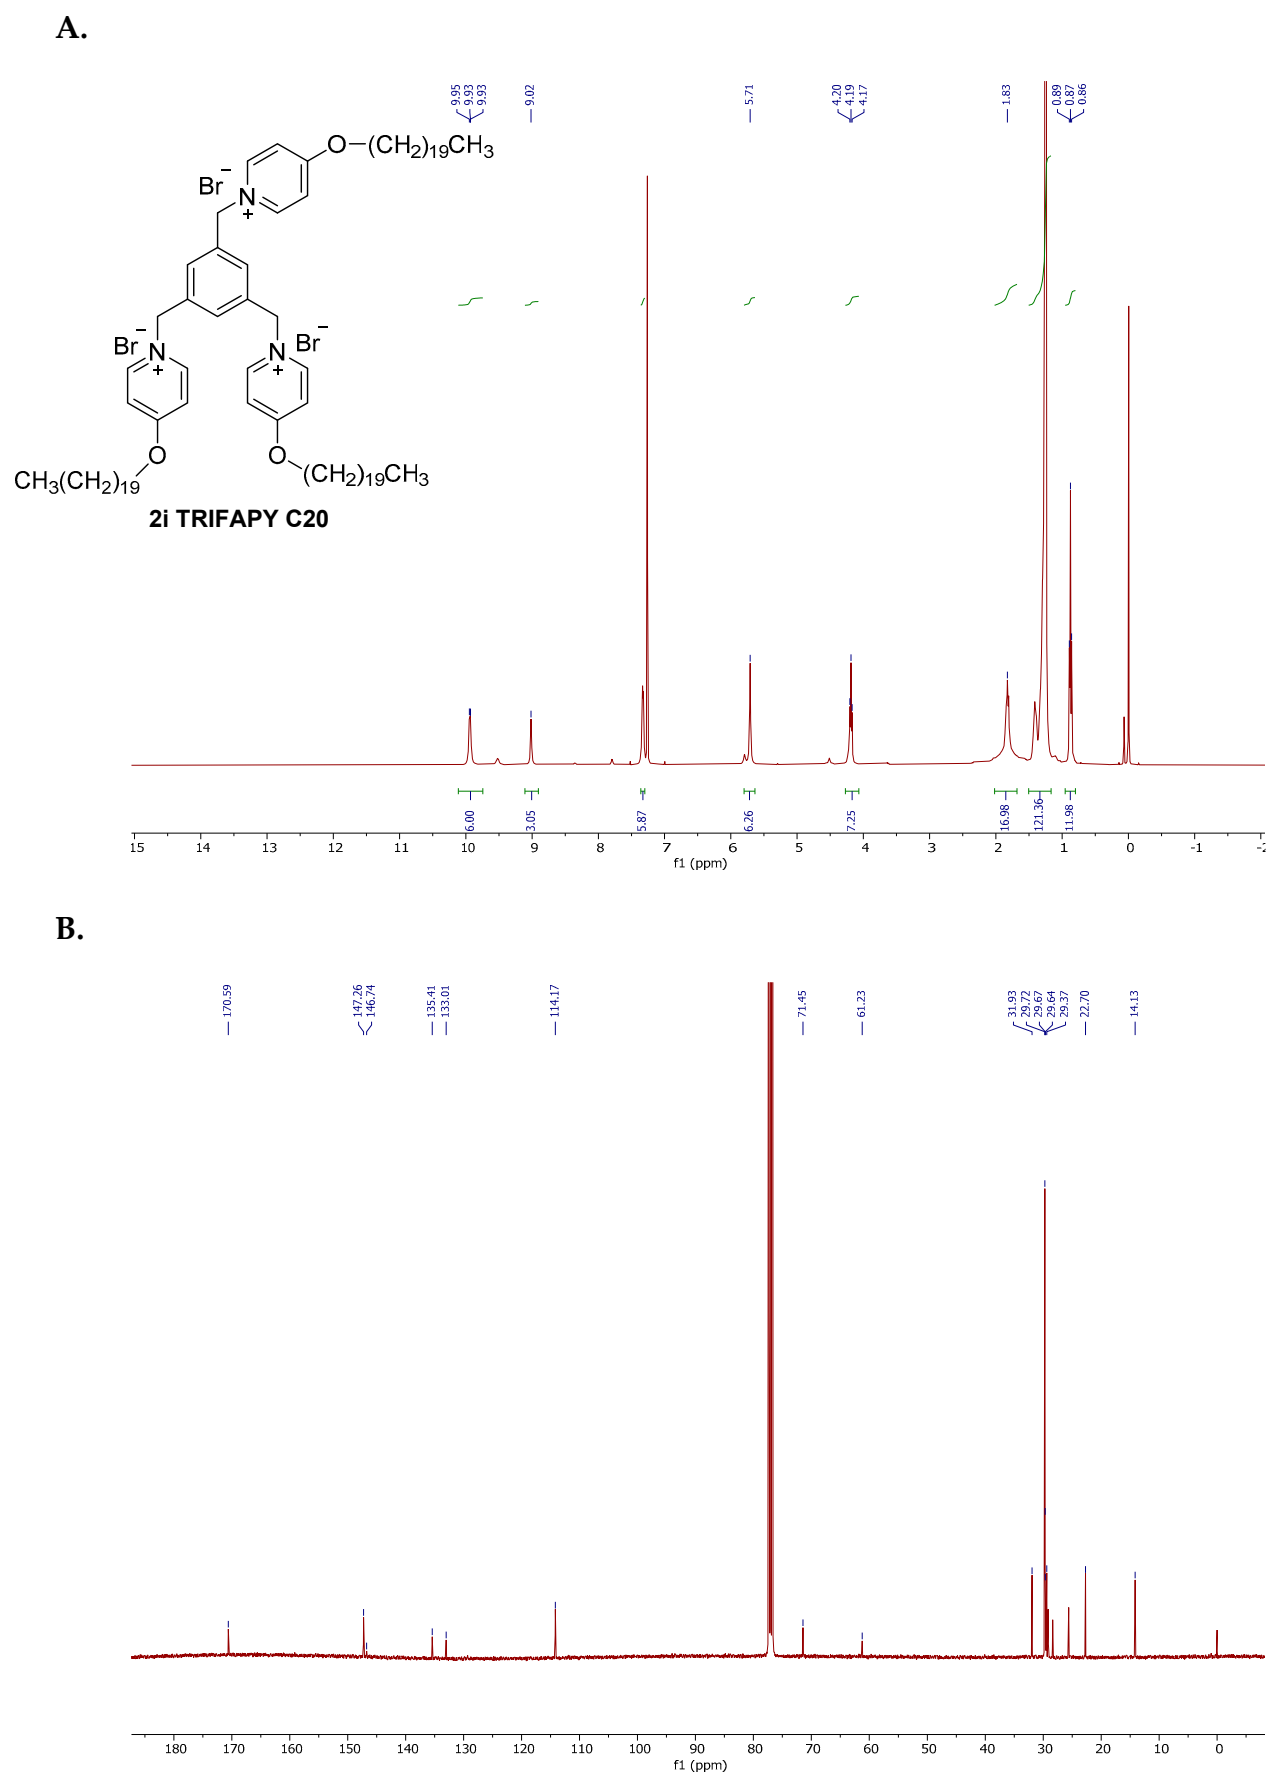

Figure S18. (A)  $^1\text{H-NMR}$  (400 MHz,  $\text{CDCl}_3$ ) and (B)  $^{13}\text{C-NMR}$  (100.6 MHz,  $\text{CDCl}_3$ ) spectra of 1,3,5-Tris(4-eicosanyloxypyridiniummethyl)benzene tribromide.

**A.**

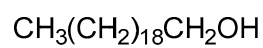

**3**

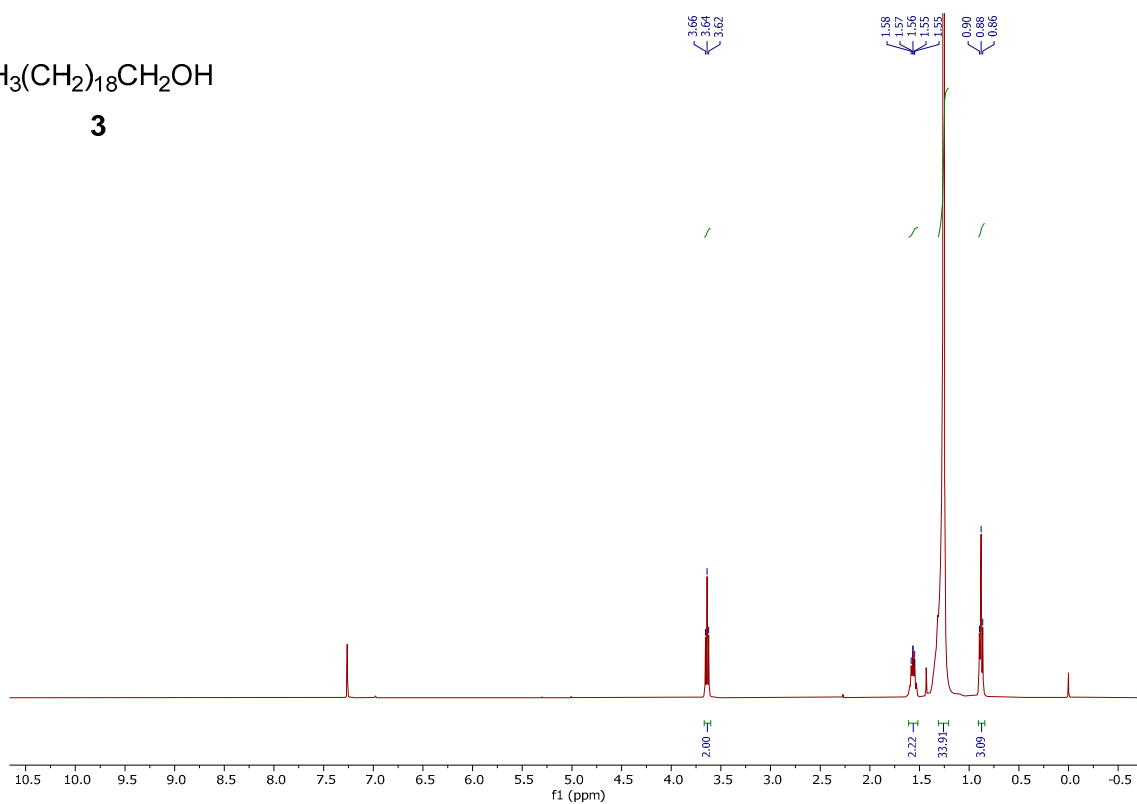

**B.**

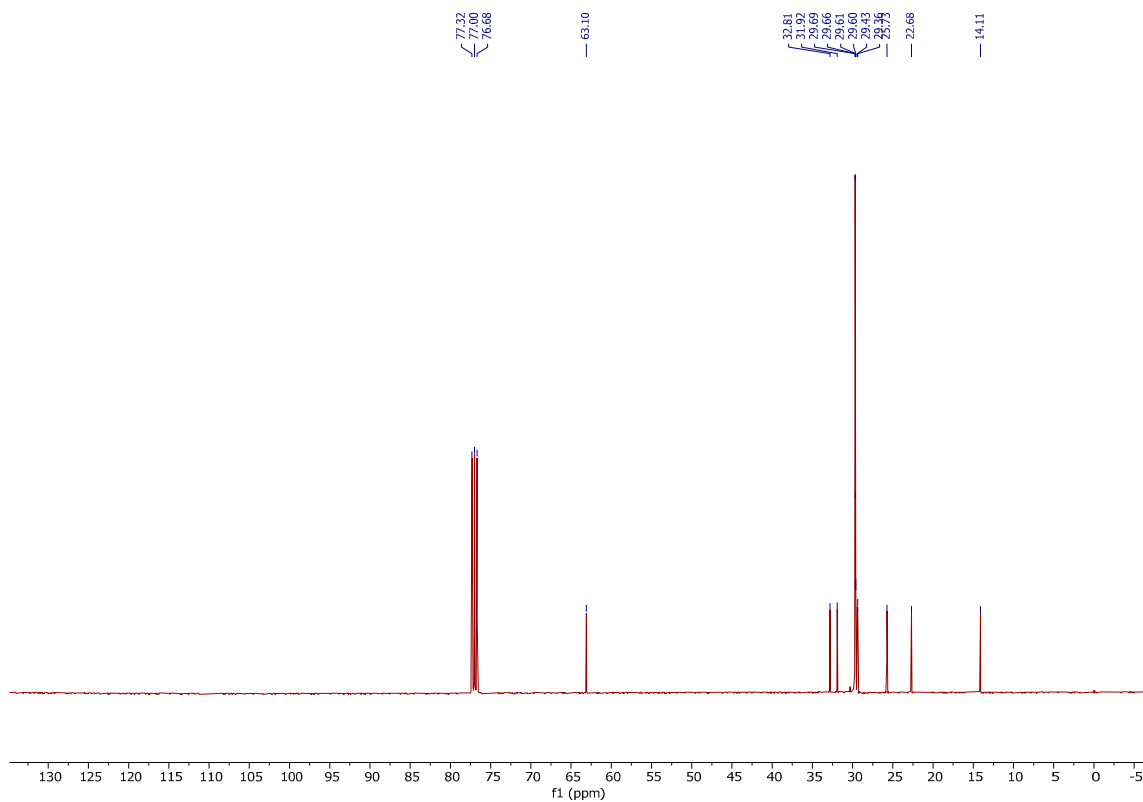

**Figure S19. (A) <sup>1</sup>H-NMR (400 MHz, CDCl<sub>3</sub>) and (B) <sup>13</sup>C NMR (100.6 MHz, CDCl<sub>3</sub>) spectra of 1-Eicosanol.**
